# Supplementary material for: NMNAT promotes glioma growth through regulating post-translational modifications of P53 to inhibit apoptosis
Source: eLife. 2021 Dec 17;10:e70046. doi: 10.7554/eLife.70046 (PMC8683086; doi:10.7554/eLife.70046)
Supplement: Source data 1. [file elife-70046-supp1.xlsx]

## Sheet: figure 1
	figure 1G_Volumes
	GDF+GFP	Rasv12+GFP
	0	1027497
	0	513224
	0	561207
	0	733397
	figure 1H_Survival %
	lacZ+lacZ	Rasv12+GFP
Adult	100	0
	100	0
	100	0
Larval	0	17
	0	54
	0	1
Pupea	0	83
	0	46
	0	99
	figure 1I_Nmnat intensity in 100AEL					figure 1J_Nmnat intensity in 150AEL
	GFP+GFP	Rasv12+GFP				GFP+GFP	Rasv12+GFP
	45975	176569				36641	64476
	64353	148340				94406	35099
	120002	119136				15170	204888
	105349	66414				11700	114985
	83942	452683				35260	255386
	87382	98314				51793	54113
	43656	315911				129181	130117
	58610	76791				264760	160028
	107817	97204				38742	147513
	47518	55491				23443	69411
	19989	28936				27129	187668
	90626	690285				32232	99415
	92728	44745				29228	196250
	34084	43396				15778	117746
	121346	283890				14048	256983
	43038	50269				11898	83721
	113811	128203				28184	188876
	136139	78671				33307	17424
	105277	113578				53799	247699
	71771	408523				20484	91347
	246488	167455				35517	90132
	379588	38945				21136	216307
	96255	270830				38616	186468
	52632	239254				17421	214190
	400289	39690				23491	20361
	151845	19843				17633	203558
	230520	1077650				22618	588731
	123569	560128				21745	46946
	113538	42790				60854	101842
	48112	225349				15122	177161
	164218	33309				119596	302143
	94722	236265				115475	92596
	83025	385263				35448	46523
	33512	58149				128235	87305
	229828	181350				25169	235491
	348027	141427				280899	158247
	78369	210390				61960	251020
	2295	93257				154485	24669
	2295	157792				445648	37710
	1785	39970				172641	162740
	255	120779				18145	295080
	2295	70766				237080	294190
	6120	51126				24630	356504
	13770	20871				57379	224480
	2550	37848				24011	86109
	14280	89686				21635	149902
	10200	96739				165538	125705
	1020	137465				42310	216276
	3570	118641				145762	177540
	2040	31994				131326	248842
	1275	236541				15424	233125
	510	165893				15190	140915
	1530	65054				17326	365516
	2295	47183				26118	150592
	255	166152				24946	336793
	2295	47777				14434	646650
	2295	46577				13578	44183
	1275	176336				39962	181655
	5610	371592				30074	7877
	2040	41420				19139	66106
	510	87694				24796	140363
	1275	191665				15309	21307
	1020	281003				50208	215504
	1530	81217				65646	263151
	2040	43248				41954	210435
	510	173268				14581	383034
	1530	71773				45756	100941
	1020	118769				51331	138318
	765	361099				34572	451008
	1785	119838				22011	89233
	1275	127202				27946	180216
	3825	127501				48503	397534
	1275	453562				30798	99002
	2550	107990				65645	426915
	1275	128685				34275	127961
	13260	341761				38725	208698
	1785	160321				33904	255002
	3825	654325				58367	381456
	2295	1183054				69449	217146
	4080	91660				15442	91580
	1275	117195				51422	20620
	510	133545				129452	698842
	510	51802				66406	122552
	2295	326387				35043	241143
	765	33064				213141	82559
	2295	121386				49032	64501
	765	61639				30566	214774
	1275	35380				134554	264786
	255	105494				37641	649701
	1530	68271				18281	255947
	255	99715				295445	695281
	255	181446				16157	404091
	510	237842				146168	70983
	510	105005				26246	70045
	106085	352304				33366	64433
	107311	240747				40278	110880
	121211	113804				74085	496732
	185046	57882				77249	226351
	214250	85112				115220	150372
	28619	105008				32062	305789
	173146	52386				50150	257910
	94118	234477				116783	164516
	19547	190263				59179	81567
	12147	347139				47339	79804
	41675	90192				107221	54371
	12848	221317				312883	205567
	77363	263259				20478	430094
	88728	134648				295457	509862
	11921	702152				36581	135979
	42222	45660				47926	37144
	21589	236586				320150	188494
	221382	179926				21728	336402
	92965	277597				180923	141051
	136509	92333				158481	170940
	45864	416855				43967	68360
	23463	65259				106745	40901
	301344	100756				300102	143585
	29994	31063				33013	222848
	35795	210626				284914	151442
	32297	173902				23431	267623
	57703	145445				175782	46216
	21014	17354				29336	102983
	83575	322866				23365	198580
	32477	315663				124969	55616
	36895	77902				35186	80625
	146726	1407647				107611	23716
	10912	426153				60378	617419
	47126	192823				26360	155098
	18811	92231				49687	94308
	19315	1033058				87113	78889
	105087	344270				23001	337682
	54388	689361				125627	214899
	78410	206002				192795	156746
	26122	330316				36330	9124
	176790	311839				39238	218881
	117841	994385				54648	37828
	70109	202834				143690	218688
	173454	657569				17237	203314
	96508	615264				95607	411945
	358320	442133				50889	314485
	22595	37703				17420	90004
	18139	188919				22201	206764
	38516	183928				14807	450693
	22907	199076				19953	23780
	281354	428446				49270	220939
	34580	389300				13524	380418
	131644	84910				35417	290842
	61642	308696				58367	130109
	20683	68190				94705	447041
	117597	137527				190027	182137
	26195	38369				21557	131219
	22906	263274				15663	105042
	51577	259354				93511	146935
	116817	74780				46999	191911
	26446	190556				54458	28559
	89763	54214				89616	121987
	21531	211236				15633	182637
	124283	67129				65562	288343
	71531	22238				36781	167614
	97602	158575				31351	301258
	65222	126228				44736	72202
	41102	599667				22698	219823
	69152	532337				42402	313478
	159507	17874				18102	217997
	115893	25751				24373	74143
	48778	21903				22477	112145
	32913	483114				20266	184815
	192430	25544				54210	64846
	15161	232265				15674	146875
	38263	150272				95975	241411
	172726	165421				99792	271835
	11634	224748				12968	60298
	75667	150118				55475	203560
	21116	106363				23177	143626
	294004	106589				25026	53192
	12504	93746				22584	55451
	63664	152626				70730	85033
	252383	89913				34582	43823
	20349	188592				28418	191431
	23710	99970				41026	150985
	56451	38338				33400	37900
	137758					21027	34308
	106042	382211				26860	74181
	21366	91247				20165	26552
	153971	87392				22966	158812
	86213	461988				14952	310057
	26037	249720				16699	109134
	222414	103888				18651	44564
	36262	95051				48569	277932
	170116	619662				49642	101001
	12475	92486				38714	130445
	33266	68390				39656	455491
	235980	217017				10784	146319
	77043	361681				59506	293504
	80370	109840				45704	346279
	23425	35385				17439	119677
	162969	116117				15318	265991
	85334	640205				21419	23525
	120934	56352				42431	27323
	46224	172046				29729	133232
	168147	30858				24867	36845
	40122	107934				30551	330116
	233008	193414				25943	1145572
	28378	225503				24184	31211
	55381	272428				37725	113990
	94516	275321				32689	191688
	43250	54437				8979	87013
	150874	193514				30705	127845
	22128	73755				11827	44895
	28962	283501				33289	97162
	46514	80280				14318	67565
	146596	973635				26986	47993
	66075	45766				85116	502361
	52262	174568				233411	169287
	67469	608400				11756	96596
	236467	385334				162805	225908
	119537	197345				121590	273953
	13588	1112752				186493	287403
	22341	103851				189044	199400
	18422	429425				190199	264343
	24320	330044				17270	355863
	81044	1666896				172539	95840
	104095	40110				113687	89733
	47492	306569				207005	275476
	37564	378256				24320	80574
	51980	216909				84871	123387
	23486	31362				196066	121959
	65496	32592				31627	183185
	14447	123559				22173	170594
	12689	94746				13348	125465
	132495	143419				33758	180062
	67885	294800				28028	98261
	75707	293569				431780	108955
	87819	212622				13763	27515
	29747	105721				34218	123222
	35819	65678				17253	154424
	38370	100291				90258	151065
	12447	392429				102574	103423
	73483	643188				32607	119741
	269150	53721				103387	170434
	169813	271609				28725	48893
	24258	176621				18405	85417
	26741	252639				49749	91366
	109485	175730				12823	237581
	139655	259373				63335	169547
	29997	314932				12691	232043
	131667	108985				70922	512685
	192385	225621				63016	168679
	33596	118489				19714	492485
	115878	440529				33633	235212
	48910	245684				183802	84875
	76593	251500				20179	280831
	37249	415679				37360	537578
	110845	108830				32965	144528
	192494	295353				17318	151295
	43752	301670				17614	87070
	25070	472731				40830	275963
	25624	31207				14222	230225
	100282	315842				39048	73681
	71421	254956				17896	135240
	157181	210763				118690	273662
	109154	276325				19455	140548
	12084	124685				54759	230146
	101923	41188				28787	155291
	13715	551082				70988	42646
	70083	264700				39316	45136
	81404	447663				15401	259228
	96265	315870				51605	187720
	17374	94696				29402	153252
	206229	145825				102490	72388
	30754	391819				10079	108659
	22288	162550				114405	150302
	24836	298956				63421	74512
	26127	234098				60293	118336
	109611	237700				12686	80368
	25203	955904				46770	142201
	9782	116164				475558	190632
	160999	203036				159349	149049
	28390	600807				122839	37243
	50285	259131				224248	639627
	13336	216351				30760	166700
	167069	632739				154396	197521
	44052	643944				50340	118170
	17975	333533				8968	305325
	21374	785779				180856	318641
	25475	231332				173304	169497
	59749	494221				15348	90899
	15058	349232				27755	44332
	6987	203581				51144	656486
	7239	123036				77841	149499
	21584	255125				41318	323928
	26732	62546				53931	91137
	8000	325281				223648	133153
	138249	655868				82267	164101
	25956	286527				131186	19846
	20494	253383				74498	81979
	15492	288706				17912	43448
	10435	278975				26606	120486
	11998	816688				159026	97275
	47402	31483				39856	170163
	12060	296006				21952	183945
	11124	57636				15244	129620
	49744	217385				61527	37354
	7946	272418				270526	81812
	28643	136625				13511	184991
	33331	209883				144164	67601
	19465	451724				35595	178603
	16090	62988				61547	320681
	290484	69771				28616	234752
	372124	797043				197221	182775
	40735	186959				58770	756191
	252229	46886				32332	118287
	122034	225833				47209	99581
	16801	190631				111058	270465
	14123	53708				10328	79985
	26947	76097				49663	67347
	147944	405542				17638	209689
	57808	341497				156959	80488
	64466	202147				69876	179012
	465047	137628				107482	264219
	23982	302909				28574	69093
	124930	259312				29105	54126
	34245	288985				9693	462706
	50116	199113				73313	183855
	106059	277801				77097	25442
	173049	435245				194651	110379
	22987	150255				14482	216090
	510799	190275				68338	199479
	38837	90897				60332	122998
	23705	361534				19950	121935
	32188	357802				58673	61900
	103780	86529				59293	146977
	54735	168025				22288	84960
	63064	1020515				35092	47186
	33851	51915				12733	368463
	57173	197667				174241	108331
	26874	125279				47557	391366
	39033	87492				49372	146659
	238725	299791				32470	117250
	25307	20127				114712	204936
	155827	271043				357838	418184
	52689	185593				12415	264739
	43536	198733				19673	184652
	78013	206288				23241	134808
	39396	252659				53033	86578
	51676	60855				40181	153748
	10852	223369				244656	187605
	52782	199393				36015	37018
	244879	156913				34650	127874
	13996	193867				54777	18007
	86401	49785				25188	25189
	71990	105328				21621	14691
	130445	79488				82998	1128579
	17659	207113				292927	13311
	44428	119792				64491	42980
	167674	189272				254146	97012
	69688	164003				17229	72807
	11104	473033				65323	112245
	32429	364492				18185	237343
	13396	109829				39873	143526
	48850	415773				22773	78946
	41236	60905				142169	16029
	48609	223368				58702	17002
	36824	1412321				8543	38386
	15025	446729				15351	84325
	54360	706085				60077	51493
	28173	187027				41574	19646
	11909	1937919				13484	16908
	139467	114630				43031	159037
	390642	381894				56831	155730
	170551	161576				36974	103097
	101582	246944				9643	51591
	79469	58958				39141	24659
	40295	87245				75118	153393
	56589	110701				46896	81551
	136205	28408				34385	380526
	106473					45928	70321
	279950	106711				24791	96859
	19127	197731				62305	83238
	32234	180654				52580	64162
	85494	105366				30130	14719
	107695	34623				87651	69113
	44677	65836				19290	19463
	10212	34024				10957	61365
	152319	40267				67945	318066
	32638	145943				66417	179460
	28079	297529				12396	475985
	28262	33225				13760	103659
	91620	395085				41887	62580
	24602	62261				54094	37572
	137106	235270				9290	697475
	76344	95500				21592	107777
	31584	35332				16778	66054
	206334	295954				10779	120726
	43880	41085				35216	942828
	43078	55631				40468	58742
	37670	99435				125690	71440
	30734	23835				10847	29942
	11572	377462				66099	127013
	13616	118205				13860	78747
	25927	371329				13301	53381
	80589	30888				10819	20916
	61173	42686				10372	129308
	102097	84270				23569	126373
	19546	98187				35309	366355
	65136	422519				18305	142053
		244600				17269	47207
		402450					47628
		155252					119561
		41483					189900
		168538					277607
		74251					42233
		304747					168368
		198422					133738
		319710					139023
		113659					103744
		101704					26299
		198447					71552
		87068					67767
		261076					29494
		47392					91405
		24131					120975
		95869					21986
		181705					21885
		150079					152777
		100088					90076
		132314					46357
		348233					81580
		132214					142406
		112658					137565
		463276					32919
		577268					80949
		474578					181855
		45547					67783
		155384					21193
		28818					654197
		201149					93040
		139639					22950
		106464					452069
		104088					60395
		177912					170379
		861235					205207
		142689					110699
		116055					79940
		213509					39000
		237652					176361
		19133					85481
		146030					77089
		172104					41464
		52053					44793
		201828					49914
		182142					232680
		58246					36845
		613586					56264
		237663					140084
		35566					73295
		39732					31900
		95563					115409
		107537					133236
		122693					194859
		105517					52454
		156978					30879
		423446					69951
		32819					42631
		133375					172628
		392632					142231
		177940					51136
		94758					136946
		44545					1285959
		141687					110491
		24050					110473
		28721					71275
		99291					101015
		47300					68353
		206567					64192
		147963					103117
		176257					783724
		204076					62067
		439260					64668
		619613					96857
		229790					148671
		139861					86610
		121100					58198
		54053					107560
		149788					112810
		194548					11787
		82898					60225
		187724					106136
		645849					41901
		82110					58980
		51605					190825
		262139					26212
		150867					51605
		199193					378101
		192742					22969
		255011					16738
		138655					42694
		358126					94091
		258124					240612
		257006					49982
		157204					26827
		240112					259051
		81625					39607
		60135					52235
		177341					27958
		73135					22430
		57730					41467
		133141					91654
		184411					44142
		169609					125884
		421506					68104
		74625					337634
		121490					143542
		365879					153761
		70724					1012753
		116508					122757
		103485					30416
		234915					144258
		42974					52798
		58863					27293
		94554					206481
		296065					191683
		143465					77419
		1358740					140625
		219386					130193
		269736					108412
		148331					148419
		118016					698581
		188099					94462
		145587					40927
		157901					23512
		283637					45326
		139544					18405
		297258					92384
		68470					51363
		133875					15395
		270698					50237
		290344					62338
		86533					125012
		401968					89590
		170542					60136
		286060					107123
		202006					50210
		273932					101644
		150581					149586
		100644					14123
		278907					41745
		714020					17590
		295058					21173
		36379					21740
		367752					114747
		228826					41060
		104493					61009
		306965					47123
		267334					83617
		23834					31872
		324859					48658
		268377					14241
		139859					933031
		153146					97745
		579119					88071
		139373					38819
		818661					64652
		34475					343337
		452593					140477
		271366					39962
		243401					42690
		95627					39681
		103591					28332
		206263					227458
		183047					95520
		275619					293144
		99099					51902
		135473					110380
		59061					61160
		81577					197684
		288320					18537
		192004					287261
		52592					44234
		153621					19573
		154721					67932
		314180					62178
		240014					111909
		200554					39552
		256872					1088898
		221658					868273
		736499					34224
		208481					211016
		731794					135779
		189573					14557
		853496					80762
		203249					82126
		138177					15285
		404792					64454
		224965					223041
		238671					160064
		403849					69473
		277582					34147
		215740					30754
		81118					75671
		162595					51874
		82811					69675
		678208					57326
		56081					20208
		270132					51917
		1057342					134023
		101912					67429
		171587					310610
		732278					62761
		296123					106913
		715715					27072
		115028					109650
		142875					50722
		232686					13566
		165296					17141
		113598					90670
		219501					103390
		237948					81429
		364340					24609
		294772					16137
		43082					16000
		529841					29603
		216077					33894
		201411					78476
		128011					46189
		438799					392988
		930891					25415
		140427					40559
		342782					174201
		514942					106683
		198865					27506
		397011					49508
		302684					53999
		258661					18049
		298819					37341
		288471					78621
		317319					112894
		163026					81462
		358610					41297
		305041					39257
		211668					210217
		32492					24700
		434202					126454
		1702407					92243
		242648					177171
		266984					39722
		280747					37843
		187719					86514
		174992					73873
		217822					45371
		426397					15182
		261673					41573
		313509					23428
		102863					37012
		34780					13129
		138272					50163
		185926					36100
		37953					91119
		1593028					20876
		350675					13057
		154379					69999
		205460					91568
		289302					68431
		378342					127680
		27885					108405
		642759					41448
		212067					26074
		332259					230836
		268652					91590
		119347					76440
		180601					36738
		886025					21339
		56483					22162
		254418					42597
		264043					145791
		472998					78923
		551481					20520
		240923					119469
		530420					75146
		57902					256510
		1817600					773560
		144216					325158
		429286					244991
		537362					346035
		459498					173237
		155607					25068
		143618					21132
		1333538					63556
		254451					31378
		212042					21792
		181024					19801
		109373					26843
		215451					16109
		254990					319477
		265481					183317
		251122					145625
		66674					108555
		1345823					254956
		994090					42339
		628695					24239
		419741					14742
		151001					248307
		107867					17872
		250816					17573
		70122					23028
		468278					237834
		278296					21367
		28083					98540
		256895					51307
		92566					83569
		37424					184306
		248029					560732
		206130					22809
		212995					183393
		711508					57322
		158282					25920
		458182					24204
		121500					48826
		42935					15939
		132210					36792
		207124					43681
		95954					30551
		358734					19975
		169658					327723
		112889					384939
		867273					317826
		226304					514053
		384188					1601629
		383603					491465
		209692					131442
		222426					66328
		181424					141062
		297313					116345
		196960					71466
		407517					15349
		196203					76633
		243207					670487
		723349					64192
		27901					17144
		1130757					28856
		333525					53317
		91832					140362
		247918					521369
		139234					226344
		145228					29463
		82695					141043
		445914					139060
		385854					59725
		123687					166931
		461049					16154
		223900					30788
		236303					16583
		292327					41889
		104043					454109
		151697					21092
		165788					111516
		157055					283716
		326355					19667
		284225					54063
		254234					73256
		166865					71618
		367831					71337
		182771					519426
		320299					191633
		321284					36086
		503537					748644
		233155					39554
		113334					579145
		158051					157736
		301844					31258
		37764					248793
		197119					129936
		304997					23231
		169671					323604
		924505					38417
		567114					455056
		762989					90317
		46161					138573
		120409					411533
		120725					397100
		194787					26805
		204267					50118
		320902					130831
		188492					114068
		272825					32406
		272718					20457
		154550					56274
		168224					99394
		218495					647745
		175188					30248
		115262					52160
		400472					48218
		317937					114876
		174255					17875
		109759					42946
		111882					49188
		241392					402593
		138833					594337
		113325					299606
		141214					393619
		79017					274441
		220584					87477
		32172					52990
		15685					313339
		274634					63243
		176043					63304
		132202					374853
		127473					61718
		44200					262472
		157184					150953
		181055					334319
		303226					66124
		133448					37728
		123122					92456
		16641					162393
		407742					29332
		207822					596255
		56599					294273
		105707					90743
		159056					130931
		180220					261345
		89700					62517
		217998					62345
		132539					333766
		68114					205625
		123424					36192
		61174					206219
		195343					27968
		145776					203659
		162477					72630
		125752					144170
		30062					20312
		116093					113111
		188651					249832
		167337					33186
		96497					39600
		91179					113719
		218043					36110
		368641					329562
		171854					22466
		144009					56816
		180666					136268
		149726					19836
		255911					67228
		289513					156733
		109792					1605644
		289402					2339603
		239481					113912
		195594					76086
		129988					28237
		92117					104168
		266157					135094
		52858					41338
		100750					76295
		127831					111862
		153161					86413
		221262					34605
		86436					34797
		298312					25930
		142202					81085
		184136					52013
		172538					78893
		207334					70151
		60409					79873
		96897					37760
		138217					351049
		512493					10102
		373869					1486696
		115402					137629
		250995					120834
		559035					71241
		43018					137757
		43492					870185
		44151					382144
		166015					125768
		146777					79665
		628463					95541
		323734					41130
		98060					32977
		315952					73771
		116209					13721
		139751					49593
		231620					97730
		37311					110530
		67440					103261
		151415					18666
		70891					26687
		33173					82628
		248449					28360
		85480					62256
		137917					351221
		296722					138032
		884526					112588
		621206					296453
		91048					157768
		229678					48361
		285563					225947
		29670					58177
		63351					114480
		277426					68879
		212590					146928
		230730					93832
		166727					156224
		404369					327817
		93607					68640
		69514					66716
		197169					131455
		505262					48618
		325584					122346
		209182					153275
		112253					126791
		129676					152774
		522516					193578
		137303					46423
		106690					49525
		125001					110892
		71233					31269
		80669					127271
		394517					96223
		194613					15447
		382527					137219
		128905					128262
		81773					369917
		116747					38779
		71905					61011
		452995					86758
		479373					99319
		419876					463595
		132365					313437
		201541					19118
		243278
		148494
		60051
		218789
		111354
		300931
		347855
		900584
		85559
		255911
		224646
		154391
		58997
		80792
		237584
		254611
		372527
		65256
		290718
		138370
		167095
		93557
		183146
		287826
		617137
		82102
		254715
		143299
		32509
		597472
		118420
		95358
		512675
		234451
		160369
		60176
		99959
		161796
		129833
		63683
		283906
		135936
		135920
		115629
		29559
		278173
		44846
		184235
		97846
		108237
		52321
		137374
		174751
		61696
		248924
		130650
		277449
		245329
		183172
		251454
		260548
		52281
		42381
		115270
		126030
		308814
		68208
		138894
		286017
		231611
		297356
		138341
		248993
		115383
		110800
		263778
		163587
		226583
		72473
		270494
		411127
		65337
		591061
		197335
		233079
		94501
		116558
		366545
		192530
		229755
		142216
		192529
		535051
		266853
		255090
		297624
		206661
		82338
		82756
		159342
		103100
		170728
		77844
		143731
		176949
		188225
		64417
		209278
		80826
		249338
		147372
		481168
		489513
		192948
		207708
		182521
		26952
		93684
		342453
		1546322
		122852
		212131
		185801
		1687147
		72269
		277902
		271092
		274924
		151189
		210851
		124227
		211357
		259696
		196813
		180148
		769167
		546333
		86492
		263479
		45238
		181638
		430188
		174482
		111554
		114263
		137747
		189105
		102237
		24972
		110416
		221044
		263192
		73494
		103602
		89012
		145879
		162587
		69794
		121515
		156788
		27387
		319968
		76522
		179610
		52045
		31819
		141405
		53876
		20391
		280561
		204135
		216404
		125415
		128421
		106260
		188695
		144912
		95189
		139722
		64002
		222308
		194069
		125872
		156574
		104781
		78374
		81513
		143754
		125998
		85802
		120329
		232610
		131988
		116938
		159751
		177128
		51814
		175228
		110099
		163780
		107599
		126621
		80568
		185624
		449269
		30550
		99498
		711001
		134791
		152397
		1257154
		157819
		28960
		586845
		74350
		34070
		64998
		49403
		149648
		28658
		51013
		107199
		308142
		390659
		285604
		182631
		140619
		372323
		199715
		128280
		104144
		127468
		63378
		89474
		313366
		54281
		230504
		98862
		164854
		247622
		111682
		63470
		90829
		64269
		30555
		258734
		17066
		347371
		85931
		155175
		82098
		146374
		36596
		224008
		218177
		162080
		24124
		96747
		25536
		119998
		167031
		25760
		108888
		28321
		306773
		122192
		161967
		129913
		175089
		111670
		453954
		217834
		144578
		48004
		845856
		269003
		449830
		586553
		504455
		582624
		838962
		217566
		522586
		88207
		107783
		169392
		261660
		413810
		356758
		1099746
		127842
		778004
		163934
		304223
		279420
		141811
		110915
		193249
		30641
		129052
		186893
		69432
		94319
		508503
		131125
		120280
		176996
		135622
		332338
		38388
		300228
		319449
		42686
		107858
		106225
		455540
		324728
		1073669
		111270
		39789
		84797
		165730
		243542
		210304
		247341
		27117
		117211
		109393
		76275
		37076
		244033
		100277
		88799
		269768
		276767
		101505
		27105
		133572
		103574
		382256
		65018
		639949
		42017
		81964
		177463
		198376
		152084
		47319
		460738
		192185
		219437
		396042
		480064
		95363
		115210
		145313
		78644
		227641
		346008
		161783
		54782
		153474
		30955
		28255
		50521
		184041
		871418
		181742
		141893
		90666
		351238
		865619
		213603
		159953
		107813
		715326
		196416
		47961
		120587
		221265
		52224
		117801
		328434
		749272
		220111
		292846
		310570
		243863
		356297
		104174
		72608
		405217
		27611
		265482
		125779
		43084
		79761
		40158
		63973
		181122
		229073
		572912
		161762
		31193
		61830
		161962
		123282
		50143
		39205
		24226
		218505
		159833
		190818
		60138
		96247
		88613
		547693
		301126
		210307
		677427
		81726
		1486116
		357160
		128897
		124579
		505834
		319512
		173867
		443984
		48421
		27531
		397063
		442661
		167406
		21386
		522089
		62787
		82145
		21243
		265444
		441415
		206394
		585963
		26344
		84078
		88223
		143924
		15254
		675560
		124958
		590009
		19198
		124636
		102365
		756286
		33157
		75200
		31365
		35408
		145242
		305961
		499433
		499480
		631839
		283813
		299264
		372988
		372832
		494413
		130500
		368936
		244457
		98184
		95869
		36701
		242518
		112206
		591767
		256447
		131204
		394364
		691268
		76389
		377728
		410411
		211219
		186467
		619647
		150348
		157886
		573191
		227969
		824477
		329607
		278377
		246855
		953470
		216654
		283976
		255729
		520391
		28567
		67168
		151720
		252516
		128838
		305811
		685880
		699242
		241719
		300542
		42496
		443396
		407667
		372078
		362799
		142330
		769647
		522691
		58867
		151181
		136908
		125017
		144302
		166109
		284793
		513026
		217713
		360993
		114165
		236048
		286050
		264362
		129745
		495350
		524084
		84168
		240153
		302478
		230890
		162657
		109849
		63318
		299755
		427838
		529692
		277770
		452927
		416156
		226488
		81043
		160995
		205100
		72628
		221683
		282704
		207850
		151429
		240428
		324015
		242919
		315818
		90193
		339314
		219552
		157317
		148719
		546877
		454086
		192580
		511551
		167670
		415535
		37314
		201896
		125987
		294235
		484663
		103154
		379920
		187425
		150855
		152217
		195336
		30644
		251313
		226101
		168084
		297103
		267264
		326995
		262973
		286150
		199752
		17043
		118442
		226076
		326466
		148564
		224091
		77480
		114567
		164873
		51989
		388194
		224187
		77198
		237545
		75608
		419160
		41636
		457966
		250057
		97485
		33754
		31715
		215538
		208754
		111734
		216051
		308009
		208145
		331426
		290985
		245941
		169492
		191610
		187449
		110300
		245454
		400806
		312427
		204505
		87689
		265364
		72027
		60143
		82511
		260767
		223079
		431667
		27412
		203708
		265517
		102648
		125670
		169094
		64677
		27632
		111237
		70910
		66283
		62659
		102708
		16564
		923984
		364456
		61411
		132198
		719134
		329208
		48882
		90993
		351892
		212373
		33219
		1549709
		133515
		36827
		52171
		35475
		123750
		350350
		132131
		34157
		57247
		232299
		2459942
		194445
		1064614
		45741
		37779
		1039859
		549579
		174645
		181520
		253490
		57842
		76669
		54579
		32368
		197845
		163173
		39978
		1289713
		103510
		23390
		124982
		32259
		356419
		81089
		193285
		339703
		184589
		152611
		27362
		129217
		62310
		1084518
		353121
		219131
		193321
		172126
		69959
		171082
		378376
		185192
		746830
		928878
		117990
		46082
		273304
		129137
		1774587
		242946
		727739
		302313
		83468
		851902
		180490
		45521
		104414
		394211
		604049
		70216
		164189
		117516
		146203
		1072105
		888821
		205440
		598943
		27516
		189193
		423957
		288527
		751585
		612913
		188368
		145199
		211811
		95391
		165627
		67584
		82578
		457396
		210146
		296443
		178738
		543473
		928580
		183802
		43793
		192873
		207381
		209043
		66489
		413099
		231410
		145721
		76940
		32322
		344974
		476108
		215887
		172468
		481184
		114770
		158266
		83264
		797003
		167382
		840891
		140186
		189074
		395642
		123262
		37868
		38254
		307849
		217462
		100603
		471880
		829267
		468541
		570338
		1271907
		308517
		439449
		269099
		166313
		268314
		146494
		123080
		129897
		71171
		80757
		149236
		476323
		307099
		272203
		176512
		167591
		290177
		55396
		206077
		282330
		315315
		20198
		791914
		196157
		148379
		372660
		21840
		68556
		199882
		243522
		51709
		409108
		284239
		105610
		59802
		23026
		404334
		190549
		105065
		230662
		73997
		486121
		186405
		115416
		139464
		73203
		159412
		321420
		101027
		407434
		646231
		99086
		59934
		116902
		269142
		153052
		359741
		146500
		93963
		105359
		43017
		487891
		33576
		254427
		362072
		208103
		90437
		93341
		249195
		249926
		316060
		512721
		207532
		125131
		229067
		218596
		468873
		269808
		221220
		359182
		117933
		281246
		186668
		120060
		39630
		281653
		323571
		1549162
		165768
		625269
		224294
		121260
		171621
		81787
		50562
		253483
		47627
		274625
		312600
		106410
		129754
		467435
		580483
		328011
		313699
		748327
		784085
		128891
		33761
		34732
		355530
		79874
		106945
		114399
		599102
		119563
		155668
		632225
		86621
		169659
		230102
		135704
		544261
		272394
		52370
		29514
		69421
		294650
		166665
		302860
		49095
		240812
		107761
		150816
		57445
		132682
		315540
		282274
		69213
		70439
		98827
		79341
		193092
		317998
		206783
		173386
		106120
		162105
		249044
		416863
		280710
		68697
		80366
		74468
		28098
		625042
		207304
		268501
		44282
		182689
		505621
		193557
		200382
		163930
		220561
		132132
		393968
		95893
		459903
		137338
		143828
		253063
		92981
		132301
		97105
		265574
		38222
		39108
		24772
		23083
		186004
		142361
		28755
		231386
		29799
		335535
		96225
		119368
		70295
		85881
		131022
		123884
		25117
		69630
		351900
		105085
		50526
		208483
		65150
		108639
		46156
		127191
		77826
		104779
		110507
		98520
		22803
		143855
		86499
		76005
		415402
		262901
		19791

## Sheet: figure 2
	figure 2C_volumes
	Rasv12;lacZ	Rasv12;nmnatRNAi	lacZ;Rasv12	PC;Rasv12	PCwr;Rasv12	PD;Rasv12
	1080584	0	566195	591222	482308	372219
	545341	0	639242	1128207	588168	385804
	1007842	0	440278	953140	93896.6	360596
	1035312	0	682388	1007563	166734	558442
	471202	0	142694	1068962	1032780	305266
	733397	0	283170	1093469	735129	361289
	490863	0	353199	308107	612436	587288
	532906	5979.44		1330504		171627
		2923.61				608534
						633606
	figure 2D_number
	Rasv12;lacZ	Rasv12;nmnatRNAi	lacZ;Rasv12	PC;Rasv12	PCwr;Rasv12	PD;Rasv12
	3	1	5	5	5	3
	4	2	7	4	5	2
	5	0	4	4	2	5
	5	0	7	6	3	3
	4	0	3	6	7	3
	4	0	3	7	4	4
	2	0	5	7	4	3
	4	0	4	6	4	3
	4		3	7	3	4
	5		6	4	3	5
figure 2E_survival %
	Adult			Larval			Pupal
lacZ;lacZ	100	100	100	0	0	0	0	0	0
lacZ;Rasv12	0	0	0	20	10	0	80	90	100
PC;Rasv12	0	0	0	14	17	35	86	83	65
PCwr;Rasv12	0	0	0	0	26	30	100	74	70
PD;Rasv12	0	0	0	8	0	0	92	100	100

## Sheet: figure 3C, F, H
	figure 3C_colony
	Negative control	siNMNAT1-1	siNMNAT1-2	siNMNAT2-1	siNMNAT2-2
	376	142	129	196	253
	369	130	124	180	332
	424	157	156	194	130
	figure 3F_colony
	Control	NMNAT1	NMNAT2
	136	170	213
	158	190	196
	147	180	184
	figure 3H_cell apoptosis
	siNMNAT1-1				siNMNAT1-2				siNMNAT2-1				siNMNAT2-2
apoptotic cells	24.1	33	46	57.3	27.7	30.8	64.6	74.4	11.6	15.9	25.8	18	40.1	18.4	43.7	39.6

## Sheet: figure 3A
Time (Hour)	Time (hh:mm:ss)	Y (E3,F3,E4,F4)	SD (E3,F3,E4,F4)	Y (E5,F5,E6,F6)	SD (E5,F5,E6,F6)	Y (E7,F7,E8,F8)	SD (E7,F7,E8,F8)	Y (E9,F9,E10,F10)	SD (E9,F9,E10,F10)	Y (E11,F11,E12,F12)	SD (E11,F11,E12,F12)
0	00:00:00	0	0	0	0	0	0	0	0	0	0
0.946389	00:56:47	0.2226	0.0033	0.2139	0.0045	0.1384	0.0038	0.2236	0.0079	0.1823	0.0085
1.19667	01:11:48	0.2869	0.0081	0.2343	0.0131	0.1516	0.0093	0.2356	0.0226	0.2034	0.0073
1.44694	01:26:49	0.3684	0.0065	0.3047	0.007	0.1585	0.0076	0.2624	0.0221	0.2982	0.0128
1.94694	01:56:49	0.7703	0.0166	0.68	0.0203	0.2434	0.0039	0.4934	0.0317	0.5477	0.0087
2.19694	02:11:49	0.9412	0.0182	0.7697	0.0141	0.3028	0.0021	0.5996	0.0308	0.6154	0.0149
2.69722	02:41:50	1.1021	0.023	0.802	0.013	0.3915	0.0091	0.708	0.0357	0.6967	0.0099
3.1975	03:11:51	1.1634	0.0199	0.7836	0.0155	0.4393	0.0109	0.7334	0.0379	0.736	0.0152
3.44778	03:26:52	1.2046	0.015	0.7859	0.0128	0.4565	0.0125	0.733	0.0372	0.7535	0.0206
3.94778	03:56:52	1.3286	0.017	0.782	0.0126	0.4805	0.0118	0.7287	0.0358	0.7952	0.0262
4.44806	04:26:53	1.4755	0.018	0.7847	0.0153	0.5107	0.0142	0.7164	0.0391	0.8295	0.0226
4.69806	04:41:53	1.5548	0.0181	0.7812	0.0171	0.5265	0.0134	0.7104	0.0391	0.8408	0.0244
5.19806	05:11:53	1.7347	0.0214	0.7872	0.0213	0.5625	0.011	0.6973	0.0417	0.8524	0.0287
5.69833	05:41:54	1.932	0.031	0.8161	0.0366	0.6012	0.0117	0.6864	0.0374	0.8638	0.0326
6.19833	06:11:54	2.1393	0.0333	0.8561	0.0331	0.6414	0.0127	0.673	0.0364	0.8879	0.0306
6.44861	06:26:55	2.2329	0.0326	0.881	0.0413	0.6625	0.0129	0.6667	0.0329	0.9023	0.0313
6.94889	06:56:56	2.4374	0.0406	0.9338	0.0371	0.701	0.0121	0.6593	0.0337	0.9363	0.0381
7.44917	07:26:57	2.6535	0.0439	0.9944	0.0412	0.7377	0.0119	0.6587	0.0286	0.9794	0.0459
7.69944	07:41:58	2.7495	0.0447	1.0278	0.0411	0.7559	0.012	0.6593	0.0296	1.0033	0.045
8.19944	08:11:58	2.9672	0.033	1.0882	0.0424	0.7922	0.0139	0.6651	0.0335	1.0533	0.0466
8.7	08:42:00	3.1946	0.0374	1.1601	0.0498	0.8215	0.0155	0.6752	0.0343	1.0951	0.0406
8.95	08:57:00	3.3274	0.0294	1.1971	0.0512	0.835	0.0174	0.6813	0.0329	1.1204	0.041
9.45028	09:27:01	3.554	0.0551	1.2693	0.0523	0.8627	0.0184	0.698	0.0343	1.1714	0.0451
9.95056	09:57:02	3.8104	0.0571	1.3467	0.057	0.889	0.0224	0.7154	0.0358	1.2257	0.0378
10.4508	10:27:03	4.0796	0.068	1.4289	0.0567	0.9096	0.0209	0.7397	0.0386	1.287	0.0333
10.7011	10:42:04	4.2041	0.0696	1.4714	0.0569	0.9182	0.0213	0.7533	0.0406	1.3227	0.035
11.2011	11:12:04	4.4491	0.0753	1.5676	0.0595	0.9373	0.0199	0.7794	0.0412	1.3979	0.0315
11.7014	11:42:05	4.7009	0.0697	1.6689	0.0646	0.9514	0.0171	0.8097	0.0398	1.4799	0.0288
11.9514	11:57:05	4.8388	0.0717	1.7227	0.0687	0.9589	0.0169	0.8238	0.0405	1.5247	0.0331
12.4517	12:27:06	5.0844	0.0642	1.8415	0.0718	0.9736	0.0162	0.86	0.0381	1.611	0.0358
12.9519	12:57:07	5.3405	0.0708	1.9591	0.0639	0.9867	0.0152	0.9043	0.0396	1.6965	0.0396
13.2019	13:12:07	5.4655	0.0681	2.02	0.0602	0.9942	0.0143	0.9276	0.0382	1.7374	0.0431
13.7022	13:42:08	5.7193	0.0657	2.1483	0.0662	1.0038	0.0085	0.9801	0.0365	1.8234	0.0462
14.2022	14:12:08	5.9733	0.0822	2.2956	0.0648	1.0173	0.0099	1.0326	0.037	1.9074	0.057
14.7025	14:42:09	6.2328	0.0891	2.4376	0.074	1.0226	0.0137	1.0941	0.04	2.005	0.0771
14.9525	14:57:09	6.3431	0.087	2.5118	0.067	1.0229	0.0138	1.126	0.042	2.0591	0.0766
15.4528	15:27:10	6.5718	0.0899	2.6697	0.0586	1.0349	0.0153	1.1938	0.0428	2.1519	0.0878
15.9528	15:57:10	6.7791	0.1108	2.8202	0.07	1.0383	0.0147	1.2639	0.0476	2.2684	0.0993
16.2028	16:12:10	6.8833	0.1042	2.9017	0.0719	1.0437	0.0157	1.3014	0.0484	2.3263	0.1047
16.7031	16:42:11	7.0691	0.1023	3.0646	0.0767	1.0554	0.0186	1.374	0.054	2.4349	0.1172
17.2031	17:12:11	7.2354	0.1035	3.222	0.0829	1.0629	0.021	1.4477	0.0521	2.545	0.1239
17.7033	17:42:12	7.3732	0.0937	3.3853	0.0899	1.0716	0.0216	1.5316	0.0533	2.6489	0.1382
17.9533	17:57:12	7.4339	0.0874	3.4664	0.0876	1.0736	0.0266	1.5729	0.0563	2.7026	0.1361
18.4536	18:27:13	7.54	0.0963	3.6063	0.0852	1.0799	0.0268	1.6539	0.0646	2.7984	0.1415
18.9536	18:57:13	7.5892	0.1136	3.7342	0.102	1.0788	0.031	1.7316	0.0604	2.8973	0.1462
19.2036	19:12:13	7.6197	0.1026	3.7976	0.1037	1.0778	0.0331	1.772	0.0613	2.9412	0.1445
19.7039	19:42:14	7.6245	0.1116	3.9127	0.1001	1.0772	0.0355	1.8559	0.0666	3.0303	0.1463
20.2039	20:12:14	7.6225	0.0982	4.008	0.1183	1.0752	0.0332	1.9374	0.0692	3.1128	0.1423
20.4542	20:27:15	7.6168	0.09	4.0459	0.1211	1.0718	0.0256	1.979	0.074	3.1512	0.1417
20.9542	20:57:15	7.6196	0.0952	4.1204	0.1107	1.0695	0.0326	2.0681	0.0818	3.2446	0.1365
21.4544	21:27:16	7.6103	0.1088	4.1616	0.0982	1.0666	0.0327	2.1564	0.0818	3.3238	0.1375
21.9544	21:57:16	7.6004	0.1325	4.1802	0.0928	1.0653	0.0314	2.2463	0.0856	3.4031	0.139
22.2044	22:12:16	7.6249	0.1457	4.1923	0.0875	1.0626	0.0318	2.2914	0.0863	3.4418	0.1336
22.7047	22:42:17	7.6825	0.1444	4.1986	0.1001	1.0588	0.034	2.387	0.0931	3.5391	0.1336
23.205	23:12:18	7.7843	0.1304	4.1779	0.0968	1.0511	0.026	2.4844	0.099	3.6384	0.1387
23.455	23:27:18	7.8486	0.1369	4.1714	0.0949	1.0524	0.0287	2.535	0.1001	3.6874	0.1411
23.9553	23:57:19	7.9942	0.1092	4.1712	0.0909	1.0536	0.0317	2.6359	0.1083	3.7791	0.128
24.4556	24:27:20	8.132	0.1216	4.1759	0.0985	1.0531	0.0297	2.7483	0.1151	3.8861	0.1236
24.7058	24:42:21	8.2131	0.1357	4.1709	0.0949	1.0572	0.0279	2.8084	0.1262	3.9363	0.1199
25.2058	25:12:21	8.379	0.1626	4.1704	0.0799	1.0597	0.0289	2.926	0.1361	4.0295	0.1256
25.7061	25:42:22	8.5396	0.1509	4.1824	0.0408	1.0664	0.0317	3.0503	0.1411	4.1343	0.1266
26.21	26:12:36	8.7023	0.1624	4.2068	0.0427	1.0776	0.037	3.1661	0.1476	4.2472	0.1252
26.46	26:27:36	8.7955	0.1612	4.2253	0.0547	1.0823	0.0371	3.2296	0.1575	4.2917	0.122
26.96	26:57:36	8.9708	0.1464	4.2651	0.0349	1.0963	0.0362	3.3496	0.1615	4.382	0.1257
27.4603	27:27:37	9.136	0.1386	4.2991	0.0561	1.1102	0.0384	3.4764	0.1729	4.4786	0.1427
27.7103	27:42:37	9.1945	0.1241	4.3156	0.0566	1.1181	0.0374	3.5368	0.1759	4.5328	0.144
28.2106	28:12:38	9.3322	0.1144	4.354	0.0547	1.1372	0.0333	3.6547	0.1782	4.6259	0.1506
28.7106	28:42:38	9.4895	0.0963	4.4216	0.0652	1.1524	0.032	3.7882	0.1786	4.7167	0.1595
28.9606	28:57:38	9.5578	0.0968	4.4548	0.0602	1.1607	0.029	3.847	0.1781	4.7648	0.167
29.4608	29:27:39	9.673	0.0927	4.5183	0.0712	1.1797	0.0268	3.9725	0.1823	4.8674	0.1653
29.9608	29:57:39	9.7987	0.1108	4.5753	0.0865	1.1988	0.0263	4.095	0.1874	4.957	0.1645
30.4611	30:27:40	9.9051	0.1097	4.6545	0.0847	1.2219	0.0279	4.2267	0.1868	5.0506	0.1622
30.7111	30:42:40	9.9547	0.108	4.6917	0.0854	1.2332	0.0286	4.2796	0.19	5.0936	0.1636
31.2111	31:12:40	10.0281	0.0937	4.7661	0.0809	1.2581	0.0286	4.4075	0.1978	5.1879	0.174
31.7114	31:42:41	10.1175	0.0846	4.8484	0.073	1.2844	0.0309	4.5279	0.202	5.2666	0.1756
31.9614	31:57:41	10.1612	0.0816	4.8841	0.0777	1.2985	0.0304	4.5857	0.2104	5.3071	0.1713
32.4614	32:27:41	10.229	0.0818	4.9607	0.0687	1.3253	0.0301	4.7057	0.214	5.3777	0.169
32.9617	32:57:42	10.3049	0.067	5.0427	0.0782	1.3496	0.0306	4.8289	0.2206	5.4502	0.1689
33.2117	33:12:42	10.3399	0.0649	5.0883	0.0602	1.3613	0.0305	4.8838	0.2226	5.4776	0.1798
33.7119	33:42:43	10.3963	0.0601	5.1896	0.0706	1.385	0.0329	5.0033	0.2193	5.5253	0.168
34.2119	34:12:43	10.4663	0.0659	5.2527	0.0836	1.409	0.0335	5.1172	0.2117	5.565	0.1592
34.7122	34:42:44	10.5234	0.0614	5.3408	0.067	1.4297	0.0341	5.2155	0.1936	5.6141	0.1546
34.9622	34:57:44	10.561	0.0597	5.3791	0.0666	1.4408	0.0341	5.2646	0.1898	5.6327	0.1536
35.4622	35:27:44	10.6176	0.0555	5.4384	0.0804	1.4657	0.0325	5.3536	0.1976	5.6747	0.1691
35.9625	35:57:45	10.6592	0.0616	5.4919	0.0761	1.4943	0.0313	5.4493	0.1988	5.7107	0.17
36.2125	36:12:45	10.6805	0.0514	5.5264	0.0869	1.5089	0.0317	5.4974	0.1898	5.7271	0.1567
36.7128	36:42:46	10.7404	0.0561	5.5684	0.0948	1.533	0.0282	5.5808	0.1738	5.7408	0.1592
37.2128	37:12:46	10.7965	0.0455	5.6114	0.1032	1.5629	0.0294	5.6542	0.1759	5.7762	0.171
37.7131	37:42:47	10.8399	0.0465	5.6441	0.0903	1.5972	0.0274	5.7325	0.1843	5.7966	0.1778
37.9631	37:57:47	10.867	0.0437	5.6641	0.0805	1.6148	0.0285	5.7666	0.1821	5.8187	0.1779
38.4631	38:27:47	10.9227	0.0582	5.6866	0.0917	1.6466	0.0316	5.8443	0.1734	5.833	0.1702
38.9636	38:57:49	10.9841	0.0565	5.7142	0.0821	1.6778	0.0303	5.9108	0.1872	5.8488	0.1792
39.2136	39:12:49	11.0224	0.0435	5.7287	0.0717	1.6933	0.0269	5.9479	0.1839	5.8715	0.1837
39.7139	39:42:50	11.0915	0.03	5.7676	0.0967	1.7289	0.0288	6.0136	0.17	5.8996	0.1917
40.2142	40:12:51	11.1847	0.0389	5.7835	0.0912	1.7641	0.0258	6.0711	0.1622	5.9105	0.1991
40.4642	40:27:51	11.2429	0.0377	5.7887	0.0883	1.7808	0.0227	6.0889	0.1558	5.9239	0.195
40.9644	40:57:52	11.3325	0.0429	5.8195	0.0924	1.815	0.0284	6.1358	0.1564	5.9234	0.1923
41.4644	41:27:52	11.4374	0.0469	5.8588	0.0886	1.8422	0.0301	6.175	0.1593	5.9575	0.1911
41.9647	41:57:53	11.54	0.0694	5.8914	0.0689	1.868	0.0265	6.2157	0.167	5.9734	0.1845
42.2147	42:12:53	11.5898	0.0593	5.9089	0.0694	1.8851	0.0236	6.2363	0.1745	5.9864	0.1919
42.715	42:42:54	11.7112	0.0814	5.9342	0.0677	1.9167	0.0225	6.2682	0.1643	6.0184	0.1951
43.215	43:12:54	11.8445	0.0779	5.9635	0.0406	1.9548	0.0299	6.3034	0.1468	6.0487	0.1946
43.465	43:27:54	11.9082	0.0728	5.9809	0.0475	1.972	0.0288	6.3266	0.1508	6.0645	0.1954
43.9647	43:57:53	12.0497	0.0765	6.0297	0.0475	2.0093	0.031	6.3641	0.1559	6.0909	0.2055
44.4647	44:27:53	12.1894	0.0846	6.0619	0.034	2.0461	0.035	6.3801	0.1537	6.1036	0.2205
44.715	44:42:54	12.2558	0.1002	6.0812	0.0351	2.0664	0.033	6.39	0.1655	6.1047	0.2227
45.215	45:12:54	12.3748	0.1051	6.1425	0.0461	2.0991	0.035	6.4193	0.1481	6.1263	0.2225
45.7153	45:42:55	12.4864	0.0993	6.1879	0.0806	2.1335	0.0344	6.4533	0.1431	6.1537	0.2284
46.2153	46:12:55	12.5887	0.1073	6.2482	0.101	2.164	0.04	6.4785	0.1292	6.1731	0.2287
46.4653	46:27:55	12.6442	0.0954	6.2593	0.0884	2.1852	0.0409	6.494	0.122	6.1848	0.2319
46.9656	46:57:56	12.7375	0.087	6.3166	0.0783	2.2226	0.0435	6.5311	0.1205	6.1976	0.2503
47.4656	47:27:56	12.8268	0.0909	6.3694	0.0612	2.2549	0.0454	6.5715	0.1154	6.2098	0.2436
47.7158	47:42:57	12.8715	0.0838	6.4018	0.061	2.2707	0.0409	6.5797	0.1162	6.2234	0.2462
48.2158	48:12:57	12.9451	0.068	6.4434	0.0535	2.3099	0.0409	6.5952	0.1184	6.232	0.2547
48.7161	48:42:58	13.0209	0.0584	6.5027	0.0372	2.3445	0.0413	6.6186	0.114	6.2563	0.245
48.9661	48:57:58	13.0529	0.0565	6.5372	0.0342	2.3606	0.0447	6.6292	0.1063	6.2694	0.2471
49.4661	49:27:58	13.1233	0.0474	6.6037	0.0457	2.3936	0.0481	6.657	0.1004	6.2852	0.2505
49.9664	49:57:59	13.1777	0.0415	6.6524	0.0528	2.4226	0.0499	6.6793	0.1192	6.3149	0.2557
50.4664	50:27:59	13.236	0.0389	6.6901	0.0607	2.4557	0.0512	6.7116	0.1194	6.3299	0.2648
50.7167	50:43:00	13.2616	0.0416	6.7023	0.0564	2.4732	0.0477	6.7143	0.1171	6.3282	0.2591
51.2167	51:13:00	13.3062	0.0485	6.7343	0.051	2.5056	0.0475	6.7235	0.1007	6.3232	0.2518
51.7172	51:43:02	13.3508	0.0514	6.7855	0.037	2.5426	0.0467	6.7495	0.0964	6.3507	0.2527
51.9672	51:58:02	13.3809	0.048	6.8105	0.0438	2.5548	0.048	6.7601	0.1004	6.3591	0.255
52.4672	52:28:02	13.4385	0.0557	6.8574	0.059	2.5861	0.05	6.7665	0.109	6.381	0.2582
52.9672	52:58:02	13.4895	0.0508	6.9067	0.0938	2.6275	0.0415	6.7771	0.1164	6.397	0.28
53.4672	53:28:02	13.5349	0.0573	6.9315	0.0935	2.6628	0.0412	6.7867	0.1074	6.4128	0.2894
53.7175	53:43:03	13.5576	0.0599	6.9403	0.0963	2.6784	0.0445	6.7898	0.1049	6.4258	0.3019
54.2169	54:13:01	13.6075	0.0577	6.9653	0.0894	2.7162	0.0555	6.7924	0.1074	6.4217	0.3069
54.7172	54:43:02	13.655	0.0598	6.9985	0.0728	2.751	0.0457	6.797	0.1401	6.4178	0.3033
54.9672	54:58:02	13.6761	0.0602	7.0114	0.0716	2.7661	0.0436	6.7991	0.1368	6.4194	0.2968
55.4672	55:28:02	13.709	0.0612	7.0414	0.0795	2.7936	0.0455	6.8104	0.1296	6.4246	0.2899
55.9672	55:58:02	13.7427	0.0637	7.0714	0.0901	2.8226	0.0463	6.8114	0.1344	6.4351	0.2965
56.2172	56:13:02	13.7627	0.0624	7.0857	0.0902	2.8465	0.0477	6.8019	0.1338	6.4396	0.2941
56.7172	56:43:02	13.804	0.0678	7.1166	0.0942	2.8852	0.0431	6.797	0.1285	6.4532	0.2889
57.2172	57:13:02	13.8336	0.0756	7.1444	0.0983	2.9256	0.0443	6.7921	0.125	6.4656	0.2918
57.7175	57:43:03	13.8599	0.0806	7.1419	0.0796	2.9599	0.0425	6.7825	0.1266	6.4708	0.302
57.9675	57:58:03	13.8699	0.0834	7.1628	0.0943	2.9763	0.0449	6.7841	0.1291	6.4738	0.3076
58.4675	58:28:03	13.903	0.084	7.187	0.1073	3.0078	0.0488	6.7865	0.1276	6.4802	0.3088
58.9675	58:58:03	13.9361	0.0887	7.2098	0.1108	3.0419	0.0487	6.7993	0.1423	6.4704	0.3159
59.2175	59:13:03	13.948	0.0912	7.2118	0.1173	3.0613	0.0499	6.8062	0.1465	6.473	0.3135
59.7178	59:43:04	13.9765	0.0869	7.2375	0.1225	3.1026	0.0521	6.7997	0.1507	6.4595	0.3046
60.2178	60:13:04	13.9898	0.086	7.2542	0.124	3.1415	0.0503	6.7858	0.1385	6.4585	0.3141
60.4678	60:28:04	14.0008	0.0886	7.2742	0.1207	3.1653	0.0511	6.7804	0.1256	6.454	0.3199
60.9681	60:58:05	14.0165	0.076	7.2986	0.121	3.1998	0.059	6.7678	0.1392	6.4658	0.334
61.4681	61:28:05	14.0391	0.083	7.3011	0.1088	3.2341	0.0633	6.761	0.148	6.4581	0.3195
61.9683	61:58:06	14.0635	0.1	7.3198	0.1201	3.2568	0.0613	6.7586	0.1463	6.4684	0.3226
62.2183	62:13:06	14.0802	0.1026	7.3329	0.1131	3.271	0.0651	6.7644	0.1354	6.4767	0.3345
62.7186	62:43:07	14.0971	0.092	7.3604	0.0883	3.3081	0.06	6.7632	0.1305	6.4685	0.3403
63.2186	63:13:07	14.1111	0.0855	7.37	0.0676	3.3378	0.0576	6.7538	0.1192	6.4534	0.3363
63.4686	63:28:07	14.1156	0.0827	7.3892	0.065	3.352	0.0578	6.7464	0.119	6.4517	0.3413
63.9689	63:58:08	14.1265	0.0766	7.4063	0.0805	3.3757	0.057	6.7439	0.1317	6.4503	0.3519
64.4689	64:28:08	14.1289	0.0926	7.4091	0.0852	3.4044	0.058	6.7334	0.1344	6.4484	0.3532
64.9686	64:58:07	14.1258	0.1022	7.4201	0.1054	3.436	0.0554	6.7247	0.1487	6.4529	0.349
65.2186	65:13:07	14.1253	0.0985	7.433	0.1047	3.4523	0.0549	6.7265	0.1444	6.4568	0.3473
65.7189	65:43:08	14.124	0.1081	7.4491	0.1118	3.4782	0.0468	6.7255	0.1375	6.4494	0.3506
66.2183	66:13:06	14.1087	0.1077	7.4668	0.1238	3.5073	0.0566	6.7303	0.1303	6.4471	0.3458
66.4683	66:28:06	14.1038	0.1125	7.4703	0.1167	3.5198	0.056	6.7346	0.1291	6.4447	0.347
66.9681	66:58:05	14.0846	0.1115	7.481	0.1227	3.5521	0.053	6.7353	0.126	6.4331	0.354
67.4681	67:28:05	14.0761	0.1054	7.4897	0.1085	3.5806	0.0413	6.7306	0.1369	6.4254	0.3588
67.7183	67:43:06	14.0727	0.1076	7.4883	0.1	3.5941	0.0382	6.7304	0.1365	6.4194	0.3624
68.2183	68:13:06	14.0522	0.1058	7.4886	0.0928	3.6146	0.0419	6.7247	0.1325	6.4198	0.3585
68.7186	68:43:07	14.0348	0.1046	7.4991	0.1241	3.6376	0.0414	6.7185	0.1407	6.4201	0.357
69.2186	69:13:07	14.012	0.1192	7.5024	0.1232	3.6706	0.0438	6.7265	0.1503	6.413	0.3476
69.4686	69:28:07	14.0033	0.1228	7.5081	0.117	3.6887	0.0445	6.7303	0.1445	6.4032	0.3508
69.9683	69:58:06	13.9796	0.1122	7.5353	0.1073	3.7108	0.0441	6.7355	0.1448	6.4005	0.3656
70.4683	70:28:06	13.9579	0.1329	7.5535	0.1183	3.7442	0.0479	6.7337	0.1552	6.3958	0.372
70.7186	70:43:07	13.9444	0.1285	7.5611	0.1191	3.7564	0.0428	6.7483	0.1643	6.4002	0.3677
71.2181	71:13:05	13.9135	0.1243	7.5622	0.1398	3.7817	0.0353	6.7601	0.1539	6.397	0.3587
71.7183	71:43:06	13.88	0.1285	7.5735	0.1653	3.8051	0.0384	6.7749	0.1577	6.3965	0.357
71.9681	71:58:05	13.8569	0.1321	7.5745	0.1646	3.8188	0.0438	6.779	0.1644	6.4018	0.3654
72.4681	72:28:05	13.8215	0.1283	7.5869	0.1563	3.8351	0.0544	6.8014	0.1646	6.3971	0.3711
72.9686	72:58:07	13.7808	0.1303	7.6025	0.168	3.8622	0.0508	6.8265	0.1615	6.3993	0.3731
73.4686	73:28:07	13.7411	0.1303	7.5777	0.186	3.8829	0.0484	6.8512	0.1717	6.3997	0.3719
73.7189	73:43:08	13.7247	0.1303	7.5747	0.181	3.8941	0.0502	6.8669	0.1735	6.4026	0.367
74.2194	74:13:10	13.6857	0.1294	7.5776	0.163	3.917	0.0449	6.8929	0.1668	6.4005	0.3826
74.7197	74:43:11	13.6378	0.1439	7.5966	0.1718	3.944	0.0405	6.928	0.1677	6.4004	0.3904
74.97	74:58:12	13.6118	0.1454	7.602	0.1812	3.9603	0.041	6.9503	0.1676	6.3954	0.3922
75.4703	75:28:13	13.5643	0.1484	7.608	0.1885	3.9813	0.0479	6.9955	0.1739	6.3935	0.3942
75.9706	75:58:14	13.5322	0.1483	7.619	0.1891	4.0038	0.0473	7.0441	0.1782	6.3939	0.397
76.2208	76:13:15	13.5118	0.1497	7.6226	0.1917	4.0158	0.0509	7.07	0.1794	6.3906	0.4004
76.7208	76:43:15	13.4693	0.1521	7.6365	0.1952	4.0295	0.0525	7.134	0.1785	6.3941	0.4138
77.2214	77:13:17	13.4202	0.1536	7.6448	0.2027	4.0487	0.058	7.1972	0.1825	6.3762	0.4249
77.7214	77:43:17	13.3774	0.155	7.6617	0.2106	4.0739	0.055	7.252	0.1965	6.3618	0.4279
77.9717	77:58:18	13.3603	0.1592	7.657	0.2136	4.0853	0.0598	7.2806	0.1895	6.3645	0.4312
78.4719	78:28:19	13.3191	0.1679	7.6631	0.2135	4.104	0.0626	7.3364	0.1988	6.3637	0.4119
78.9722	78:58:20	13.265	0.1625	7.6534	0.2018	4.123	0.0585	7.4019	0.2275	6.3576	0.4152
79.2225	79:13:21	13.2376	0.1566	7.6497	0.2049	4.1306	0.0588	7.4431	0.2298	6.3581	0.4254
79.7225	79:43:21	13.1989	0.1695	7.6766	0.2177	4.1488	0.0674	7.5008	0.2434	6.3515	0.4421
80.2231	80:13:23	13.1456	0.1641	7.6981	0.2194	4.1684	0.0714	7.5645	0.2627	6.3528	0.4592
80.7231	80:43:23	13.0987	0.1732	7.7276	0.2445	4.1857	0.0707	7.6205	0.2845	6.3552	0.4653
80.9733	80:58:24	13.0696	0.1823	7.7351	0.2385	4.1951	0.073	7.6535	0.2903	6.3512	0.4721
81.4736	81:28:25	13.0204	0.1796	7.7521	0.2321	4.2048	0.0712	7.7142	0.2946	6.3546	0.4903
81.9742	81:58:27	12.9673	0.1943	7.7702	0.2529	4.2224	0.0663	7.7764	0.2951	6.3523	0.5109
82.2244	82:13:28	12.9433	0.1942	7.7873	0.2564	4.2305	0.0681	7.7974	0.2852	6.3537	0.5155
82.7247	82:43:29	12.8939	0.1906	7.8156	0.2728	4.2515	0.0667	7.8403	0.2835	6.3635	0.5322
83.2253	83:13:31	12.8408	0.196	7.8385	0.2839	4.2661	0.0708	7.8844	0.2906	6.3705	0.5598
83.4753	83:28:31	12.8133	0.1945	7.8519	0.2897	4.2759	0.0779	7.9101	0.2873	6.3764	0.5558
83.9758	83:58:33	12.7499	0.1934	7.8704	0.2863	4.2851	0.0735	7.9669	0.2827	6.3836	0.5794
84.4758	84:28:33	12.7009	0.1924	7.9025	0.2904	4.3052	0.0738	8.022	0.2627	6.3892	0.6083
84.9764	84:58:35	12.6442	0.1973	7.9296	0.2867	4.3156	0.0686	8.0664	0.2501	6.3999	0.6288
85.2264	85:13:35	12.6138	0.202	7.9541	0.2835	4.3198	0.0672	8.0816	0.2444	6.4077	0.635
85.7269	85:43:37	12.5457	0.1912	7.9984	0.2958	4.3341	0.0736	8.1299	0.2472	6.4202	0.6509
86.2272	86:13:38	12.489	0.1785	8.0352	0.3116	4.3499	0.0695	8.18	0.2436	6.4353	0.6652
86.4772	86:28:38	12.4651	0.1815	8.0495	0.3205	4.3527	0.0668	8.2026	0.2441	6.4466	0.6801
86.9778	86:58:40	12.4046	0.1863	8.0857	0.3177	4.3614	0.0703	8.2513	0.2359	6.4722	0.7074
87.4778	87:28:40	12.3623	0.1892	8.1364	0.3272	4.377	0.0717	8.2999	0.2386	6.4992	0.7323
87.7281	87:43:41	12.3364	0.1848	8.1595	0.341	4.383	0.0673	8.3244	0.2361	6.5082	0.7372
88.2283	88:13:42	12.2878	0.1813	8.1946	0.359	4.3903	0.0697	8.355	0.2197	6.5329	0.7583
88.7286	88:43:43	12.2243	0.1665	8.2519	0.3652	4.4014	0.0641	8.3945	0.2179	6.5541	0.7774
89.2289	89:13:44	12.1732	0.1605	8.2966	0.3779	4.41	0.0676	8.4299	0.2247	6.5698	0.8026
89.4789	89:28:44	12.1358	0.1614	8.3169	0.3721	4.418	0.067	8.4478	0.2294	6.5871	0.8133
89.9794	89:58:46	12.0722	0.1693	8.3615	0.373	4.4248	0.0677	8.4793	0.2324	6.6129	0.8221
90.4794	90:28:46	12.0183	0.1636	8.4151	0.3688	4.4381	0.0633	8.5084	0.2268	6.6304	0.8431
90.7297	90:43:47	11.9849	0.1679	8.4315	0.3726	4.4483	0.0639	8.5159	0.2225	6.6372	0.8484
91.2303	91:13:49	11.9258	0.1667	8.4715	0.3848	4.4584	0.0702	8.5386	0.2305	6.6671	0.8704
91.7303	91:43:49	11.8637	0.1681	8.5161	0.397	4.4659	0.0775	8.5746	0.2052	6.6862	0.8762
91.9806	91:58:50	11.8345	0.1763	8.5392	0.4084	4.4652	0.0749	8.593	0.2127	6.6954	0.8883
92.4808	92:28:51	11.7812	0.1837	8.5815	0.4096	4.4728	0.0692	8.616	0.2203	6.7158	0.908
92.9814	92:58:53	11.717	0.1788	8.6233	0.4022	4.4901	0.072	8.6409	0.2261	6.7387	0.914
93.4814	93:28:53	11.6524	0.1859	8.65	0.3886	4.5019	0.0698	8.6555	0.225	6.7578	0.9258
93.7317	93:43:54	11.6207	0.1887	8.664	0.3852	4.5131	0.0704	8.6599	0.2301	6.7704	0.9318
94.2319	94:13:55	11.5451	0.1928	8.6963	0.3822	4.5283	0.0765	8.6782	0.2309	6.782	0.9645
94.7325	94:43:57	11.4865	0.193	8.7464	0.3841	4.5395	0.0766	8.7016	0.2355	6.7955	0.9714
94.9828	94:58:58	11.4514	0.1901	8.7535	0.3829	4.5448	0.0737	8.7125	0.2374	6.802	0.9935
95.4828	95:28:58	11.394	0.1825	8.7865	0.3838	4.5445	0.0831	8.7137	0.2469	6.8009	0.9925
95.9833	95:59:00	11.3543	0.1733	8.838	0.3709	4.5485	0.0875	8.7252	0.2617	6.8248	0.9992
96.2333	96:14:00	11.3228	0.1631	8.8552	0.3781	4.5549	0.0783	8.7392	0.2505	6.8095	1.0046
96.7336	96:44:01	11.2421	0.169	8.8564	0.4047	4.5499	0.0742	8.7571	0.2471	6.8144	1.0136
97.2339	97:14:02	11.183	0.1586	8.881	0.3984	4.5578	0.0772	8.7503	0.2458	6.8182	1.0236
97.7344	97:44:04	11.1192	0.1473	8.9011	0.3915	4.5609	0.07	8.7732	0.2528	6.8207	1.0205
97.9847	97:59:05	11.0922	0.1463	8.903	0.3901	4.5633	0.0701	8.7787	0.2521	6.8256	1.0192
98.4847	98:29:05	11.0466	0.1448	8.9067	0.3784	4.5685	0.0803	8.7918	0.2595	6.8244	1.0388
98.9853	98:59:07	10.9961	0.1576	8.9177	0.366	4.5716	0.0762	8.8079	0.2711	6.8331	1.0589
99.2353	99:14:07	10.9697	0.1573	8.9149	0.3758	4.5673	0.0765	8.8064	0.2706	6.8302	1.0615
99.7358	99:44:09	10.9063	0.1625	8.9134	0.3761	4.5711	0.0807	8.8106	0.2566	6.8451	1.0579
100.236	100:14:10	10.8608	0.1598	8.9244	0.3598	4.5765	0.0739	8.8223	0.2347	6.8645	1.078
100.486	100:29:10	10.8379	0.1642	8.9284	0.356	4.5865	0.0732	8.8285	0.2281	6.8676	1.0834

## Sheet: figure 3D
figure 3D_cell growth
Time (Hour)	Time (hh:mm:ss)	Y (C1,D1,C2,D2)	SD (C1,D1,C2,D2)	Y (C3,D3,C4,D4)	SD (C3,D3,C4,D4)	Y (C9,D9,C10,D10)	SD (C9,D9,C10,D10)
0	00:00:00	0	0	0	0	0	0
1.42333	01:25:24	0.0659	0.0031	0.0636	0.0054	0.0447	0.0076
1.67389	01:40:26	0.088	0.004	0.0873	0.0085	0.0609	0.0089
1.92417	01:55:27	0.1057	0.0055	0.1097	0.011	0.0747	0.0104
2.67417	02:40:27	0.134	0.0079	0.1536	0.0127	0.101	0.0136
3.17444	03:10:28	0.1435	0.0103	0.1727	0.0147	0.1138	0.0132
3.67444	03:40:28	0.1497	0.0108	0.1885	0.0158	0.1234	0.0137
4.42472	04:25:29	0.1589	0.0107	0.2136	0.0165	0.1379	0.0174
4.925	04:55:30	0.1666	0.0122	0.2315	0.0178	0.1449	0.018
5.67528	05:40:31	0.1753	0.0127	0.256	0.0174	0.1583	0.0189
6.17583	06:10:33	0.1801	0.0154	0.2698	0.0206	0.1657	0.017
6.92611	06:55:34	0.1867	0.0164	0.2885	0.0221	0.1757	0.0174
7.42611	07:25:34	0.1928	0.0159	0.3008	0.0237	0.1815	0.0192
8.17667	08:10:36	0.1963	0.0229	0.3162	0.0245	0.1914	0.0238
8.67667	08:40:36	0.2028	0.026	0.3283	0.0256	0.1982	0.0257
9.42722	09:25:38	0.2092	0.0268	0.3422	0.0257	0.2066	0.0238
9.9275	09:55:39	0.2141	0.0298	0.3494	0.0268	0.2141	0.0244
10.4278	10:25:40	0.2178	0.0314	0.3591	0.0284	0.2186	0.023
11.1783	11:10:42	0.2227	0.0264	0.3721	0.0328	0.2283	0.0263
11.6783	11:40:42	0.2275	0.0278	0.3827	0.0322	0.2323	0.0297
12.4289	12:25:44	0.2378	0.0302	0.3999	0.0317	0.2356	0.035
12.9292	12:55:45	0.2406	0.0319	0.412	0.0342	0.2418	0.0362
13.6794	13:40:46	0.2482	0.0339	0.4265	0.0358	0.2488	0.0355
14.1797	14:10:47	0.2515	0.0344	0.4384	0.0364	0.254	0.0344
14.93	14:55:48	0.2592	0.0366	0.4568	0.0374	0.2631	0.0353
15.43	15:25:48	0.2626	0.0389	0.4702	0.0382	0.266	0.0346
15.9303	15:55:49	0.2686	0.0383	0.4836	0.041	0.2701	0.0348
16.6803	16:40:49	0.2742	0.0404	0.5066	0.0437	0.2792	0.0347
17.1806	17:10:50	0.279	0.0418	0.517	0.049	0.2841	0.0337
17.9308	17:55:51	0.2884	0.0421	0.5409	0.0512	0.2913	0.0324
18.4308	18:25:51	0.2934	0.0447	0.5576	0.0525	0.2955	0.0337
19.1811	19:10:52	0.2998	0.0454	0.5826	0.0573	0.3005	0.0299
19.6811	19:40:52	0.3069	0.0464	0.6002	0.0599	0.3071	0.0312
20.4314	20:25:53	0.3135	0.0496	0.6236	0.0644	0.3126	0.032
20.9317	20:55:54	0.32	0.0518	0.6383	0.064	0.3191	0.0315
21.4319	21:25:55	0.3272	0.0531	0.6549	0.0657	0.3261	0.0325
22.1825	22:10:57	0.3314	0.0565	0.6818	0.0698	0.3363	0.0353
22.6825	22:40:57	0.3397	0.0587	0.7027	0.0702	0.3439	0.0365
23.4331	23:25:59	0.347	0.0646	0.7327	0.074	0.352	0.0363
23.9333	23:56:00	0.3539	0.067	0.7543	0.0759	0.3564	0.0351
24.6836	24:41:01	0.3662	0.0703	0.7842	0.0775	0.364	0.0373
25.1839	25:11:02	0.3744	0.0734	0.8057	0.0825	0.3725	0.0382
25.9342	25:56:03	0.3868	0.0799	0.842	0.085	0.3821	0.0387
26.4378	26:26:16	0.3963	0.0831	0.8647	0.0886	0.3892	0.0394
26.9381	26:56:17	0.4064	0.0847	0.8901	0.0922	0.3985	0.0402
27.6881	27:41:17	0.4204	0.0905	0.929	0.1024	0.4109	0.0404
28.1886	28:11:19	0.4277	0.094	0.9484	0.115	0.4198	0.0428
28.9389	28:56:20	0.4425	0.0957	0.9881	0.1242	0.4303	0.0435
29.4389	29:26:20	0.4529	0.0971	1.0139	0.1268	0.4357	0.0445
30.1894	30:11:22	0.4683	0.1037	1.056	0.1348	0.4515	0.0456
30.6894	30:41:22	0.4804	0.1072	1.0874	0.14	0.4611	0.0492
31.44	31:26:24	0.4972	0.1123	1.1331	0.148	0.4789	0.0504
31.9403	31:56:25	0.5082	0.1159	1.1656	0.1516	0.4904	0.0489
32.6903	32:41:25	0.5242	0.1221	1.2202	0.1616	0.5098	0.0514
33.1906	33:11:26	0.5366	0.1263	1.25	0.165	0.5221	0.0503
33.6906	33:41:26	0.5465	0.1281	1.284	0.1701	0.5366	0.0526
34.4411	34:26:28	0.5665	0.1352	1.3384	0.1748	0.5571	0.0527
34.9414	34:56:29	0.5797	0.1385	1.3777	0.1795	0.5715	0.0555
35.6917	35:41:30	0.5992	0.1466	1.4393	0.1976	0.5934	0.055
36.1919	36:11:31	0.6161	0.1507	1.4869	0.2056	0.6097	0.0574
36.9422	36:56:32	0.6449	0.1613	1.5491	0.217	0.6323	0.0626
37.4422	37:26:32	0.6596	0.1656	1.5917	0.2285	0.6506	0.0639
38.1925	38:11:33	0.6873	0.1741	1.6586	0.24	0.6805	0.0626
38.6925	38:41:33	0.7038	0.1824	1.7085	0.2519	0.7004	0.0639
39.1928	39:11:34	0.7258	0.19	1.7581	0.2663	0.7179	0.0619
39.9433	39:56:36	0.7515	0.1974	1.8385	0.2843	0.7529	0.0619
40.4431	40:26:35	0.7727	0.2047	1.8923	0.3076	0.7749	0.0612
41.1933	41:11:36	0.8033	0.2146	1.9835	0.3371	0.8069	0.066
41.6933	41:41:36	0.8239	0.2225	2.0398	0.3519	0.8304	0.0638
42.4436	42:26:37	0.8609	0.2363	2.1335	0.3774	0.8659	0.0667
42.9439	42:56:38	0.8866	0.2464	2.2055	0.3967	0.8944	0.0665
43.6939	43:41:38	0.9211	0.2578	2.3131	0.4273	0.9332	0.0669
44.1942	44:11:39	0.9506	0.2697	2.3907	0.4453	0.9616	0.0681
44.6942	44:41:39	0.9784	0.2829	2.4631	0.454	0.9933	0.0661
45.4444	45:26:40	1.0271	0.3046	2.5803	0.4858	1.0395	0.0714
45.9447	45:56:41	1.0555	0.3152	2.6615	0.5119	1.0745	0.0721
46.6947	46:41:41	1.1044	0.3341	2.7848	0.5341	1.1251	0.0746
47.195	47:11:42	1.1393	0.3445	2.8736	0.5561	1.1599	0.0767
47.9453	47:56:43	1.1923	0.3712	3.015	0.5868	1.2159	0.0802
48.4453	48:26:43	1.2266	0.3849	3.114	0.6081	1.2545	0.0815
49.1956	49:11:44	1.2828	0.4097	3.2667	0.6391	1.3193	0.082
49.6956	49:41:44	1.3182	0.4245	3.3604	0.6683	1.3637	0.0849
50.1958	50:11:45	1.357	0.4385	3.4593	0.6969	1.4075	0.0857
50.9458	50:56:45	1.4209	0.4711	3.6142	0.7294	1.4783	0.0871
51.4458	51:26:45	1.4614	0.487	3.7189	0.7477	1.5263	0.091
52.1958	52:11:45	1.5251	0.5174	3.8822	0.7804	1.6078	0.0935
52.6958	52:41:45	1.5715	0.5384	3.9905	0.8034	1.6586	0.0976
53.4461	53:26:46	1.6396	0.5684	4.1645	0.8313	1.7416	0.1011
53.9464	53:56:47	1.689	0.5905	4.2863	0.8614	1.8051	0.1077
54.6964	54:41:47	1.7623	0.6212	4.4725	0.8985	1.9005	0.1141
55.1964	55:11:47	1.8136	0.6465	4.5925	0.9332	1.9642	0.1148
55.9467	55:56:48	1.8951	0.6874	4.7595	0.9588	2.0653	0.1142
56.4467	56:26:48	1.9527	0.7194	4.8729	0.9848	2.137	0.1147
56.9467	56:56:48	2.012	0.749	5.0037	1.0214	2.2087	0.1189
57.6969	57:41:49	2.1026	0.7969	5.1947	1.0498	2.3232	0.1208
58.1969	58:11:49	2.1634	0.8259	5.3149	1.0668	2.4077	0.1271
58.9472	58:56:50	2.2598	0.8627	5.5014	1.097	2.5447	0.1385
59.4475	59:26:51	2.3228	0.8924	5.6302	1.1238	2.6344	0.1358
60.1975	60:11:51	2.4364	0.9501	5.8029	1.1333	2.7838	0.1419
60.6978	60:41:52	2.5098	0.9891	5.9235	1.1313	2.8839	0.1501
61.4481	61:26:53	2.614	1.0476	6.0955	1.1236	3.0347	0.1432
61.9481	61:56:53	2.6865	1.0779	6.2098	1.1319	3.142	0.1452
62.4483	62:26:54	2.7645	1.1154	6.338	1.1262	3.2491	0.1559
63.1981	63:11:53	2.8762	1.1773	6.4826	1.1117	3.413	0.1668
63.6983	63:41:54	2.9563	1.2195	6.5929	1.107	3.5403	0.1786
64.4486	64:26:55	3.0856	1.2729	6.7514	1.0973	3.7178	0.1871
64.9483	64:56:54	3.1632	1.3155	6.8681	1.0843	3.8393	0.1926
65.6981	65:41:53	3.2896	1.3838	7.0369	1.0492	4.0266	0.2085
66.1981	66:11:53	3.3676	1.4231	7.1351	1.0262	4.1635	0.2188
66.9483	66:56:54	3.4918	1.4836	7.2673	0.9901	4.3648	0.2184
67.4486	67:26:55	3.5714	1.5325	7.3635	0.9758	4.4918	0.2285
67.9486	67:56:55	3.6611	1.5787	7.4598	0.965	4.6219	0.2294
68.6989	68:41:56	3.7819	1.6318	7.6036	0.9143	4.8263	0.2474
69.1989	69:11:56	3.8568	1.6701	7.6788	0.8976	4.9441	0.252
69.9489	69:56:56	3.9898	1.7404	7.7986	0.8619	5.1572	0.2742
70.4489	70:26:56	4.0768	1.7818	7.8812	0.8588	5.2867	0.2877
71.1989	71:11:56	4.2069	1.8389	7.9969	0.8021	5.4896	0.3005
71.6989	71:41:56	4.292	1.8696	8.0659	0.8036	5.6284	0.3074
72.4489	72:26:56	4.4203	1.9253	8.1775	0.772	5.8182	0.3004
72.9492	72:56:57	4.4987	1.9456	8.2392	0.7407	5.9517	0.3134
73.6992	73:41:57	4.6109	1.9674	8.3168	0.6883	6.1314	0.3057
74.1994	74:11:58	4.6984	2.0126	8.372	0.6613	6.2468	0.3105
74.6994	74:41:58	4.7876	2.0489	8.4631	0.6455	6.3822	0.3125
75.4497	75:26:59	4.8644	2.0689	8.5216	0.6137	6.557	0.3222
75.95	75:57:00	4.9368	2.0799	8.5403	0.5731	6.6475	0.3238
76.7	76:42:00	5.0535	2.1079	8.6051	0.5307	6.83	0.3319
77.2003	77:12:01	5.1251	2.1197	8.6352	0.5129	6.9332	0.326
77.9506	77:57:02	5.2034	2.1274	8.6922	0.4873	7.0988	0.3176
78.45	78:27:00	5.258	2.1285	8.729	0.4502	7.1997	0.3259
79.2	79:12:00	5.3735	2.1351	8.7793	0.441	7.3481	0.342
79.7	79:42:00	5.4247	2.1449	8.8232	0.4339	7.438	0.3427
80.2003	80:12:01	5.473	2.1617	8.8484	0.3953	7.5114	0.3168
80.9503	80:57:01	5.5771	2.1733	8.8724	0.3693	7.6456	0.3232
81.4503	81:27:01	5.6186	2.1836	8.911	0.3559	7.736	0.3105
82.2003	82:12:01	5.7021	2.2007	8.9334	0.3297	7.8651	0.2879
82.7003	82:42:01	5.7493	2.2106	8.9475	0.3207	7.9478	0.2883
83.4503	83:27:01	5.8346	2.2111	8.9681	0.2909	8.0623	0.3094
83.9506	83:57:02	5.8737	2.235	8.9922	0.2734	8.1229	0.287
84.7008	84:42:03	5.9419	2.218	9.0263	0.2558	8.2284	0.2904
85.2008	85:12:03	5.9798	2.2143	9.0438	0.2281	8.272	0.2805
85.7008	85:42:03	6.0269	2.2166	9.0717	0.2225	8.3201	0.2946
86.4508	86:27:03	6.0944	2.2031	9.1074	0.2213	8.4264	0.2649
86.9508	86:57:03	6.1276	2.2077	9.1453	0.2312	8.4713	0.2706
87.7008	87:42:03	6.1942	2.2027	9.1902	0.2326	8.5488	0.2577
88.2008	88:12:03	6.2279	2.2106	9.2189	0.2265	8.6018	0.2421
88.9508	88:57:03	6.2627	2.1971	9.2957	0.2214	8.6733	0.2579
89.4511	89:27:04	6.2956	2.1797	9.3566	0.2333	8.713	0.2411
90.2006	90:12:02	6.331	2.1585	9.44	0.246	8.7839	0.2533
90.7003	90:42:01	6.3512	2.1629	9.5112	0.2669	8.8183	0.2466
91.4506	91:27:02	6.4027	2.1737	9.6036	0.2783	8.874	0.2288
91.9506	91:57:02	6.4377	2.1643	9.6784	0.283	8.9314	0.2363
92.4506	92:27:02	6.4698	2.1588	9.7488	0.28	8.9714	0.2445
93.2006	93:12:02	6.4993	2.1315	9.87	0.2788	8.9988	0.2328
93.7006	93:42:02	6.5169	2.1238	9.9593	0.2653	9.0151	0.2298
94.4506	94:27:02	6.5215	2.0983	10.1049	0.2776	9.0516	0.23
94.9506	94:57:02	6.5331	2.0667	10.1787	0.2759	9.0746	0.2304
95.7006	95:42:02	6.5377	2.0412	10.3035	0.2641	9.1148	0.2437
96.2006	96:12:02	6.4996	2.0087	10.3732	0.251	9.1059	0.2513
96.9506	96:57:02	6.5073	1.9685	10.4355	0.2641	9.1032	0.2566
97.4506	97:27:02	6.5071	1.9467	10.506	0.2553	9.0959	0.275
97.9506	97:57:02	6.5013	1.9226	10.5708	0.2607	9.087	0.2634
98.7006	98:42:02	6.5305	1.8917	10.6413	0.2379	9.1036	0.2701
99.2	99:12:00	6.552	1.8821	10.6832	0.2526	9.1066	0.2821
99.9503	99:57:01	6.5799	1.8786	10.7493	0.2521	9.1358	0.2597
100.45	100:26:59	6.5738	1.8762	10.8057	0.2707	9.1653	0.2724
101.199	101:11:58	6.575	1.8644	10.8424	0.2627	9.1859	0.2857
101.699	101:41:58	6.5885	1.8426	10.8506	0.2678	9.2242	0.3118
102.449	102:26:57	6.5771	1.8097	10.8753	0.2767	9.2322	0.3221
102.949	102:56:57	6.5615	1.7966	10.8951	0.2778	9.266	0.3353
103.699	103:41:57	6.5818	1.7816	10.9286	0.3133	9.3022	0.3512
104.199	104:11:57	6.5693	1.7866	10.9502	0.3082	9.341	0.3686
104.699	104:41:57	6.5818	1.767	10.9535	0.3233	9.3717	0.3965
105.449	105:26:57	6.5907	1.7422	10.9488	0.35	9.4132	0.3912
105.949	105:56:55	6.5866	1.7258	10.9434	0.3505	9.4537	0.4035
106.698	106:41:54	6.5867	1.7183	10.9396	0.3475	9.5219	0.4172
107.198	107:11:54	6.5924	1.7291	10.9435	0.3615	9.5712	0.4235
107.948	107:56:53	6.5877	1.726	10.9277	0.368	9.6333	0.431
108.448	108:26:54	6.5894	1.7061	10.9091	0.3662	9.6805	0.4465
109.198	109:11:52	6.5836	1.6957	10.8827	0.3876	9.7679	0.4754
109.698	109:41:52	6.5993	1.6825	10.8676	0.3884	9.8224	0.4711
110.198	110:11:52	6.5886	1.6903	10.8418	0.4059	9.857	0.479
110.948	110:56:51	6.5892	1.6928	10.8265	0.4145	9.9404	0.5112
111.448	111:26:51	6.588	1.6776	10.8049	0.4201	9.9819	0.5122
112.197	112:11:49	6.5852	1.6698	10.7728	0.4516	10.0333	0.5208
112.697	112:41:49	6.5818	1.6675	10.7488	0.4526	10.0804	0.5339
113.447	113:26:49	6.5739	1.6582	10.7051	0.4449	10.1248	0.5538
113.947	113:56:49	6.5708	1.6414	10.6736	0.4665	10.1544	0.5671
114.697	114:41:49	6.6361	1.7259	10.6346	0.4658	10.1917	0.5724
115.197	115:11:49	6.5601	1.6358	10.6027	0.4625	10.2214	0.595
115.697	115:41:49	6.5829	1.6499	10.5792	0.4631	10.2271	0.6107
116.447	116:26:50	6.5924	1.629	10.535	0.4852	10.2434	0.63
116.948	116:56:52	6.5956	1.6596	10.511	0.5017	10.24	0.6214
117.698	117:41:53	6.6209	1.6387	10.4693	0.5023	10.2388	0.5943
118.198	118:11:53	6.6275	1.6482	10.4382	0.5113	10.2302	0.5827
118.948	118:56:54	6.6307	1.6534	10.4009	0.5004	10.244	0.5976
119.448	119:26:54	6.648	1.6499	10.3586	0.4955	10.2348	0.6043
120.199	120:11:56	6.6662	1.649	10.3032	0.4854	10.2247	0.605

## Sheet: figure 4
	figure 4D_caspase3 intensity						figure 4C_caspase3 intensity
	lacZ;lacZ	Ras;lacZ	Ras;nmnatRNAi				lacZ;Rasv12	PC;Rasv12	PCwr;Rasv12	PD;Rasv12
	1370.18	1824.08	11494				0.512468	0.543568	0.451141	0.669677
	1117.2	2425.68	19480.7				0.609992	0.399307	0.515183	0.986253
	667.93	1529.84	301.571				0.729954	0.298716	0.496804	0.51149
	6237.36	2888.45	480.509				0.65688	0.383499	0.502636	0.587021
	1120.29	323.167	32970.8				0.335263	0.163069	0.537947	0.552695
	4601.47	3565.64	11839.6				0.720994	0.395374	0.620337	0.282917
	1011.54	2707.97	903.171				0.230722	0.351705	0.523686	0.56832
	982.228	793.264	610.47				0.304644	0.0524947	0.568205	0.337769
	3246.71	6407.04	16356.6				0.802277	0.204155	0.333584	0.35065
	995.725	2769.67	392.197				0.457499	0.302065	0.335408	0.59095
	3440.3	3482.34	542.211				0.46144	0.561054	0.927853	0.580821
	618.954	638.236	5872.16				0.480927	0.325382	0.99595	0.676604
	443.487	2372.46	12734.6				0.594872	0.298716	0.75551	0.538521
	652.505	480.123	25342.4				0.864875	0.227311	0.493162	0.434244
	4205.41	1528.3	3459.2				0.708159	0.172935	0.763318
	2792.81	3827.1	19380.8				0.588573	0.380738	0.356065
	2382.88	935.565	5668.54					0.212303
	819.873	4568.3	2513.61					0.326489
	988.012	1128.39	22161.2					0.532653
	1241.38	1239.84	955.233					0.549655
	2035.41	3209.3	398.753					0.790669
	2247.9	3463.06	18579					0.837866
	489.378	3609.99	15159.2
	745.83	2638.56	7272.42
	1340.1	2492.01	12839.9
	4014.14	6026.41	10934.9
	893.53	6977.4	7924.15
	1342.42	1738.86	28982.5
	1102.93	3895.36	20061.4
	572.677	2540.22	13985.7
	621.653	20476	16040
	1433.43	7733.65	16616.9
	5256.67	2498.18	996.111
	3218.17	12429.6	23144.6
	413.793	4198.09	1188.93
	3281.8	14438.8	5559.02
	538.355	6758.74	1522.51
	478.195	1209.76	1858.02
	655.59	14319.2	569.592
	1360.93	489.764	5859.04
	1148.05	13464.7	9024
	1860.72	13975.2	34021.2
	2276.44	3636.59	25355.9
	3197.35	3252.88	35625.9
	1270.69	620.111	2411.8
	961.403	1265.29	3669.37
	517.53	270.334	6569.78
	1601.18	1223.64	27447.2
	428.833	1462.74	22043.2
	6007.52	2389.82	19563.6
	924.767	16933.9	8407.36
	539.897	8163.25	10813.4
	1772.41	671.787	4736.06
	2389.05	6892.18	5190.73
	6571.32	10905.2	11657.9
	2023.07	3063.15	32196
	3961.3	9444.35	16939.3
	575.762	543.754	4686.31
	2442.26	6679.3	19320.6
	2084.39	5480.34	19333.7
	821.03	8280.48	10807.6
	364.045	1627.4	1001.12
	249.51	2131.44	12846.5
	531.799	2389.82	335.508
	331.651	380.242	1547.96
	3126.78	2896.93	3837.51
	1442.3	7365.74	2943.98
	622.425	1466.21	8683.48
	4922.71	1456.57	16640
	541.054	2598.84	34558.4
	421.506	5055.37	7971.2
	328.18	3829.41	2605.01
	243.725	2059.71	3132.56
	360.96	2409.87	15937.8
	354.018	316.611	4729.12
	637.465	698.781	8400.8
	665.231	2512.84	7131.27
	1726.13	380.242	17961.6
	455.056	2165.37	7449.43
	4898.8	6556.28	18766.1
	1003.44	3126.78	965.259
	1303.47	4586.43	1622.39
	7637.23	4257.09	564.578
	892.759	5351.54	8415.07
	2201.62	1748.88	1148.05
	5481.12	3165.34	994.568
	1809.81	4658.93	4069.67
	2478.9	1220.17	23767.4
	1253.72	3921.97	535.27
	873.477	1109.88	2152.65
	812.931	1968.7	8902.91
	1970.24	12184.7	12692.2
	354.404	7594.04	6855.15
	1432.66	337.822	15094.8
	1973.71	3580.68	19833.5
	3692.13	6451.77	674.486
	2338.53	6882.53	3961.69
	842.24	5682.81	547.225
	395.282	3949.74	16044.2
	612.398	5578.3	8571.26
	6470.28	878.876	2260.63
	3432.98	1279.56	30235.4
	438.088	5461.45	507.118
	800.591	10391.5	8735.54
	2470.8	491.692	8598.25
	3249.03	5482.66	33703.5
	3419.09	15178.4	7333.73
	1160.01	7455.6	19181
	249.124	10995.4	832.599
	2362.05	7896.77	14126.8
	1985.67	10973.4	22277.3
	557.637	7058	22949.9
	2238.65	5987.85	2681.75
	472.41	8909.46	4955.1
	481.28	3420.25	9410.8
	3733.39	6334.54	10849.2
	1401.42	5122.47	4072.37
	708.037	13637.8	4672.43
	1607.35	950.991	1884.63
	546.453	507.504	2834.85
	2114.08	11294.3	538.355
	464.697	9755.56	38553.7
	725.391	1977.18	8016.32
	3879.93	2156.5	22362.2
	1012.69	14363.6	14670.9
	1991.45	10155.1	8137.02
	404.923	12539.5	36507.9
	1337.02	3314.58	17523.5
	3159.17	7106.59	48269.1
	4012.21	4452.23	27849.1
	2043.51	8350.67	980.299
	920.911	2862.23	19321.4
	1134.17	17147.5	617.411
	238.712	4229.32	12548.4
	296.944	4071.98	40249.3
	576.148	784.394	44201.8
	5025.67	4983.64	743.516
	2773.92	44259.2	1460.81
	445.801	5975.12	7623.74
	337.822	6501.91	966.416
	349.005	1579.2	3842.91
	362.503	2380.56	2369.76
	970.658	1923.19	18264.7
	3894.59	16233.6	1353.99
	1693.35	1689.11	19712.8
	1267.6	10961.5	17361.9
	791.721	12376	965.259
	1322.75	628.209	5650.8
	1027.73	6117.04	31526.9
	473.182	5384.7	2275.67
	711.122	13047	5432.52
	3421.41	6007.9	8091.13
	286.146	9130.05	6087.34
	323.553	3156.86	18146.3
	1873.44	12914.7	5130.18
	3758.46	2635.86	1978.72
	1654.4	23853.8	14674.4
	394.896	1562.23	1365.94
	583.86	1360.93	10005.8
	264.935	11478.2	28927.3
	4660.47	5695.92	12871.5
	2823.28	7987.78	32453.6
	3996.78	9770.6	1525.98
	7223.83	19659.6	5342.28
	1664.81	21964.6	3584.53
	12867.3	774.753	2402.93
	643.249	4684.77	22365.2
	2173.86	858.823	297.329
	448.886	521.001	1043.93
	955.233	570.363	823.344
	4003.72	15093.6	4437.57
	4454.93	641.321	11882.4
	639.393	834.913	11671
	3291.06	12022.7	2434.55
	3102.87	2202.4	1317.73
	433.46	19902.9	2337.76
	958.318	840.312	1176.2
	608.927	8226.11	1048.94
	335.893	2153.42	32121.2
	817.173	12895.8	12587.7
	1860.33	590.031	1620.08
	624.353	3535.56	8453.64
	4156.44	8859.72	656.747
	336.279	686.827	1927.43
	3264.45	2655.14	5896.45
	836.455	4478.06	31827
	1903.14	6449.85	5476.87
	8263.51	909.727	6093.51
	377.928	4098.98	41563.6
	3146.06	8406.2	1438.44
	408.779	11928.6	1408.36
	429.604	708.808	4252.85
	5192.66	22067.5	912.041
	842.24	5394.73	23167.4
	1052.41	4452.23	12006.9
	525.243	4342.32	927.467
	6373.1	21319.8	20443.2
	3233.6	11541.5	1268.76
	1310.02	7034.48	28675.1
	3087.06	7761.8	2863.38
	5985.92	16286.8	1153.84
	490.15	25344.3	29066.2
	515.602	1111.42	13274.5
	682.585	9926.78	704.952
	409.165	8022.88	10634.8
	390.654	932.094	2259.09
	2195.84	925.924	25340.5
	708.037	753.928	593.887
	296.558	10905.5	1212.45
	2433.39	13044.7	15319.2
	4303.37	2689.46	5429.05
	497.477	801.748	43443.6
	864.993	12671.8	42826.2
	1547.58	12858.8	52574.8
	568.049	711.893	7885.97
	704.566	6302.92	10545.7
	419.192	4852.91	12088.3
	1275.7	1149.98	9035.95
	683.356	930.937	7511.52
	3318.83	6136.7	684.898
	1450.01	11523.7	1512.48
	4294.11	517.53	2281.07
	775.524	9590.12	1380.21
	2189.67	2361.66	733.875
	1253.72	725.005	10493.3
	2920.07	10108.8	48931.3
	581.161	14383.2	41957.4
	2643.18	14175.8	609.313
	6357.29	677.957	1026.58
	2767.74	1554.52	14026.9
	1031.97	8184.85	1107.95
	3102.48	6959.66	4068.9
	1229.04	810.617	5643.47
	1802.49	619.725	366.745
	1166.18	1094.06	10722.8
	866.921	5356.55	3980.59
	3591.47	805.99	15555.6
	600.829	998.425	17685.5
	1694.51	16259	51251.3
	6837.41	9076.83	13010
	2021.14	18956.2	31506.1
	4224.7	672.944	10689.6
	2390.97	9421.59	14734.6
	1045.09	8486.42	8786.44
	381.013	4688.62	18994.8
	1600.8	15760.4	3348.91
	452.743	788.25	1508.63
	950.605	15368.2	17077.3
	914.355	2453.83	26026.5
	1410.67	1241.38	5260.53
	1743.48	20112.7	4859.46
	333.194	8133.17	5129.02
	422.663	6491.49	4720.63
	558.794	4951.24	8975.41
	4971.68	5115.14	24988.8
	613.555	1679.47	866.15
	995.339	9744.38	2447.28
	548.767	1637.43	9001.25
	307.356	2318.09	8579.74
	3663.59	575.376	6315.26
	3255.2	623.581	972.201
	1800.56	506.732	24229.4
	3213.55	7521.93	46240.7
	883.118	5405.92	7678.11
	834.913	541.054	837.612
	512.131	5137.12	15605
	404.923	14293	844.168
	1016.93	6238.51	25664
	1052.03	9601.69	2718.77
	446.572	2562.58	38905.4
	539.897	9575.08	6400.48
	806.375	8109.26	2711.06
	4142.17	2277.6	5729.47
	707.651	929.395	797.891
	821.801	2233.63	5873.7
	1047.02	675.643	25274.5
	893.916	5807.75	9792.58
	683.356	993.411	903.171
	1365.17	6269.75	3233.6
	505.575	10333.2	914.74
	321.625	13533.3	11790.2
	1198.57	14945.1	10060.6
	748.529	1223.25	4382.42
	656.747	15923.9	14859.5
	1340.49	4404.41	25733.8
	675.643	9415.04	14735.7
	2036.57	18049.5	31068
	398.367	12605.1	44348.3
	409.551	10314	7959.63
	989.169	31759.8	3737.63
	3317.67	8857.02	3174.6
	2415.66	2460	23190.1
	1569.17	12909.3	15874.1
	402.995	15752.7	682.585
	881.575	704.18	6743.32
	821.801	588.874	8063.37
	2908.5	11859.2	21499.9
	7309.05	1549.89	32904.8
	1144.2	4761.51	24398
	498.634	10737.4	1326.22
	1367.48	1477.01	5304.11
	671.401	14323.9	11618.6
	730.79	2489.7	7715.52
	1770.86	8546.58	9988.87
	331.266	559.951	7804.99
	663.303	3662.43	4989.04
	2355.11	9744.38	6318.34
	4670.5	6345.72	2689.07
	214.031	11782.9	1810.58
	2865.7	16693.6	18489.2
	1143.43	7312.91	1034.67
	670.244	12226.4	10839.2
	429.604	10865.4	408.008
	1629.33	1377.51	1015.39
	838.769	26091.7	1348.59
	876.948	10699.6	2363.21
	2795.9	6129.38	21632.5
	350.933	1057.43	664.074
	4195.77	11994.2	11086.4
	4308	6156.76	835.298
	624.353	2373.62	21607.5
	333.194	401.452	29342.3
	360.96	20666.9	4067.74
	301.957	5555.16	2344.31
	2933.96	4702.51	1256.8
	2712.6	5742.19	2518.62
	3422.56	6120.12	704.18
	6613.74	4358.13	3888.42
	979.142	710.736	6918.4
	3873.38	16697.5	27712.9
	693.768	9243.43	7486.06
	1927.43	37360.5	6216.15
	3941.25	22482.5	24829.9
	4231.64	1788.6	4249.38
	416.492	9058.32	343.992
	3605.74	25375.2	11066.4
	1988.75	1217.47	22325.5
	593.501	13132.6	2940.13
	3835.59	10516.8	2090.95
	3583.38	1248.71	8671.14
	1906.99	5821.64	1970.24
	424.205	16219.3	14637
	313.526	16950.5	10299.3
	586.56	2728.41	19623
	2920.84	1439.6	2141.85
	414.178	10332.5	3115.98
	1210.91	1455.8	14708.7
	1037.76	10579.7	14048.5
	795.192	18237.3	1605.04
	599.672	14046.6	4415.98
	1347.04	6253.55	2343.54
	809.846	17974.3	6734.45
	2714.14	15242.5	28201.2
	490.15	507.889	10679.2
	1068.61	1226.72	7559.34
	742.359	10831.1	6388.91
	2130.28	733.875	14245.2
	3712.57	9688.84	12693.4
	2327.73	17443.7	9934.88
	2492.01	13531	11235.3
	3146.83	11608.6	30593.7
	414.564	406.851	16753.8
	249.895	6732.52	5208.47
	2653.98	2154.58	8449.78
	2109.84	13313.5	3519.36
	746.987	726.933	33269.6
	659.06	2477.74	13688.3
	1971.4	646.72	29411.7
	691.069	9284.69	2598.84
	2559.89	8500.3	11440
	443.487	4684.38	5511.58
	3369.73	768.583	13516.7
	454.285	14807.5	10190.2
	1408.36	787.865	29426
	803.676	16230.1	1030.82
	579.618	22893.6	19526.9
	889.674	2201.62	15057
	2656.68	10944.9	12954.8
	1065.53	5866.37	8496.83
	727.319	9442.81	2080.92
	3747.66	13760.1	33805.3
	715.364	654.818	19458.3
	3264.45	3126.01	11278.8
	727.319	9065.65	6336.85
	6527.74	566.892	7452.51
	761.255	1651.32	10432
	898.158	4697.11	35478.6
	414.178	6252.4	11065.6
	4723.33	642.864	14815.6
	973.358	29403.6	6207.66
	3780.82	14004.2	17176.1
	655.975	783.623	1271.46
	780.152	5319.92	3806.28
	568.049	6899.5	14417.6
	959.86	1073.62	9964.96
	3188.09	7185.65	4218.14
	4537.84	21551.5	23246
	371.372	24686	5391.26
	937.879	4630.39	15044.6
	1047.79	11748.9	11942.1
	349.776	7571.29	6594.46
	10738.2	7874.79	3534.78
	342.064	1517.11	7273.19
	5655.81	801.362	1783.97
	3645.85	6905.67	4530.51
	4053.86	645.177	1546.04
	1340.49	7782.23	2723.4
	2262.56	11480.1	548.382
	830.285	11307	17023.3
	574.605	1564.55	5812.77
	241.026	10964.2	23772.5
	4761.51	22477.5	17599.5
	917.826	5198.83	8688.49
	4089.72	487.065	893.53
	689.912	1685.64	1879.61
	345.534	706.109	22595.9
	1003.44	703.795	324.324
	2853.74	471.253	16460.3
	310.055	5340.74	4310.69
	1025.81	2327.73	9661.08
	1586.14	8019.79	1950.96
	461.227	1551.05	2303.82
	1998.39	812.16	428.062
	888.517	18364.6	10392.2
	3148.37	1854.93	11276.1
	547.996	19634.1	8248.48
	2819.04	1141.88	12232.1
	428.447	6791.91	22597.4
	2610.02	2173.09	8383.06
	376.771	2065.11	10252.3
	3380.53	5889.9	16539.8
	2971.75	319.696	1622.78
	809.46	2534.43	2723.78
	761.255	715.364	1440.37
	438.088	7717.45	24967.2
	1719.19	643.635	20429
	749.686	2736.51	22618.2
	2061.25	16631.5	14230.1
	4898.03	14869.5	26402.5
	1324.68	1298.07	8776.42
	234.855	670.244	8098.46
	1367.48	2197.77	8892.11
	1287.65	7157.5	4038.43
	785.936	710.351	2737.66
	3281.03	2674.03	12869.6
	4915.77	2660.15	9916.76
	3795.48	17741.4	9730.88
	1646.69	16834	15037.3
	2889.22	7574.38	8901.37
	1341.26	1239.45	35149.6
	643.249	2775.46	1931.29
	3116.75	3061.6	30575.2
	266.092	1102.16	6868.65
	605.071	773.21	17735.6
	829.899	2401.39	28350
	372.529	559.179	1494.74
	635.922	20015.5	1039.3
	6130.92	2603.85	4590.28
	361.346	1623.55	4866.4
	286.531	3323.07	10801
	438.859	797.506	34577
	800.591	1227.11	9787.18
	2363.98	868.849	870.777
	2049.3	7215.34	25590
	278.818	10531.9	12548
	447.344	13711.5	23816.8
	2574.54	10491.8	1354.76
	1926.28	8236.91	23377.6
	565.735	875.019	16190.4
	2083.23	8969.24	6481.85
	792.107	9187.51	13125.3
	2168.84	2084	876.948
	397.596	10227.2	16467.3
	3683.64	20530	1606.97
	764.726	6790.37	36461.6
	1825.62	5523.15	2374.01
	964.102	16709	979.914
	2485.84	4583.34	2351.25
	637.85	9583.95	3748.05
	664.459	2815.95	21765.2
	1221.71	5026.83	2949.77
	420.349	7919.91	1555.29
	1193.94	706.109	1757.37
	1631.65	746.987	14944.8
	1164.25	4901.5	7213.8
	529.871	25660.5	2248.67
	2230.55	3669.76	1334.7
	974.129	5980.52	9809.16
	2065.88	2262.17	2548.32
	787.865	29250.5	1254.49
	353.247	7238.48	1431.5
	801.748	466.626	5955.07
	639.778	9375.7	1175.05
	2947.45	8001.28	2137.99
	2557.96	809.46	2305.36
	465.854	4703.28	3056.2
	3455.34	414.178	2792.43
	2085.93	5328.02	19167.1
	1141.5	1917.02	932.094
	2834.46	11228.7	6252.01
	1239.07	1919.72	5846.7
	366.745	3535.56	647.106
	1303.47	15536.3	64613
	356.332	7170.99	575.762
	4687.08	5560.94	591.959
	598.129	1125.3	8985.43
	376.386	827.2	12371.8
	1917.02	443.102	14070.9
	668.316	867.692	3453.41
	853.809	2148.41	2409.49
	598.515	859.979	500.948
	300.029	1156.54	27326.5
	356.332	1334.32	1125.69
	623.581	6147.5	27486.2
	379.471	368.673	4429.86
	1003.82	651.733	1253.33
	576.919	15391.3	1204.74
	1008.07	5134.04	4221.23
	663.303	2282.99	596.201
	2495.48	616.64	25366.3
	1179.29	4257.86	51810.9
	2234.02	1932.45	26396.7
	465.083	8379.59	3208.15
	1995.31	1850.69	1215.54
	2079.38	1805.96	9179.03
	4152.2	9687.3	20209.1
	1513.26	537.584	1057.04
	1516.34	3389.4	42981.6
	1234.82	698.396	1281.1
	2645.88	905.099	16491.9
	4414.05	1583.44	1939.77
	2140.31	452.743	5198.83
	638.621	1966	861.908
	1202.43	1074.01	7579.39
	346.691	1243.31	18146.3
	2600.76	11942.5	5805.05
	2631.23	14673.6	1116.82
	5276.34	3259.44	28705.6
	488.993	3236.3	32404.6
	2001.86	8139.73	986.084
	498.248	2913.9	1861.1
	704.952	6425.16	27799.7
	4364.3	639.393	19770.3
	5275.57	9395.76	832.599
	6496.89	1267.22	11445
	405.694	741.202	19114.3
	1647.07	2041.97	6499.98
	3961.3	13593.1	741.973
	4297.2	1886.17	4735.67
	615.869	2206.64	41508.5
	420.349	4351.96	22924
	2754.25	4956.26	15668.2
	2379.41	647.877	3050.81
	1554.52	6161.77	45479.8
	228.685	7693.92	20343.7
	1974.1	4375.48	527.943
	1247.16	775.524	3436.06
	2990.26	493.235	6579.03
	703.024	12028.5	24806
	8066.45	1418.39	7284.76
	2926.24	11301.2	803.29
	1996.46	1810.97	13826.8
	487.065	8912.16	1681.01
	207.475	441.945	12101.8
	322.01	677.957	25719.9
	421.506	10666.4	9380.72
	852.652	1814.44	8268.53
	1043.16	5842.08	15417.9
	2028.86	3706.01	2289.16
	455.828	302.343	10587.4
	2474.66	3889.19	16405.2
	932.094	2179.26	719.22
	299.643	1497.44	19419
	4231.64	3303.4	5966.64
	1310.41	712.279	3392.48
	1041.62	2885.75	809.846
	588.488	3029.6	21411.6
	1472.38	3134.49	10240.3
	369.444	623.581	4550.18
	991.097	2001.86	1637.82
	5093.93	6919.17	21741.7
	1910.08	4304.14	18762.2
	1438.83	873.091	17899.1
	829.128	6036.05	7067.64
	2128.35	1498.6	40501.9
	589.645	973.358	21362.6
	610.47	6945.78	2299.19
	1052.8	1692.58	5318.76
	1615.45	20945.3	10568.9
	725.776	3182.7	32048.7
	608.156	1605.81	738.888
	451.2	3874.15	15942.4
	443.873	2414.88	19138.2
	493.235	4508.53	3595.33
	690.683	5122.47	18759.5
	724.619	1311.18	6131.69
	532.956	1783.59	22598.2
	536.041	11844.2	2672.88
	598.9	24671.8	3195.04
	1409.13	4867.56	20643.4
	677.957	3239.38	10847.3
	1515.18	13949.4	22065.2
	880.418	1968.7	1143.43
	3484.27	4693.64	3661.28
	386.027	19723.2	10176.7
	1345.5	29621.9	863.45
	4086.64	6751.03	24471.2
	1564.16	878.105	5398.2
	3910.01	1914.71	15107.9
	6509.23	10754.8	18217.7
	291.93	1994.92	977.6
	725.005	4329.98	56673.8
	409.936	8403.5	5772.27
	278.433	2600.38	21808.4
	467.011	3974.03	15666.7
	572.677	425.748	3430.66
	703.024	2307.68	21627.9
	461.227	14406.4	1112.96
	2588.81	19187.2	9044.82
	1231.35	5363.49	2325.41
	1168.49	5699.39	3265.99
	708.423	3809.36	10982.3
	369.058	2996.43	36531.4
	652.505	14720.7	18205
	371.758	771.282	8091.9
	2985.25	14691	21307.8
	918.983	6761.83	2578.78
	237.169	4553.65	2008.8
	463.155	7380.01	1013.85
	841.469	11412.7	19201.5
	1719.57	2252.91	509.432
	4166.08	2413.73	12681
	1941.32	5592.95	3834.04
	1800.94	1644.37	546.068
	1864.19	13642	553.395
	754.699	632.837	10205.2
	1724.2	3978.27	379.085
	724.234	2862.61	3950.12
	3396.34	826.043	31668.5
	881.19	1789.37	3046.95
	915.126	4279.46	35422.3
	1179.68	1308.09	18628
	3717.97	809.075	8669.98
	307.742	1100.62	1020.41
	391.426	5076.96	12838
	1066.3	728.476	8325.99
	566.507	3394.41	5095.09
	541.44	657.518	15614.2
	2959.41	1773.56	7216.5
	887.36	319.311	7685.82
	818.33	3904.23	19356.1
	1927.43	1989.91	19815.4
	4888	1120.29	9008.57
	400.681	3591.09	17223.9
	333.194	3376.67	15026.5
	389.112	1865.73	3165.34
	439.245	3372.43	1892.73
	2228.23	4867.18	6902.59
	803.676	1847.22	424.205
	406.08	3389.01	4055.01
	456.599	2210.11	8393.86
	500.562	3817.46	17385.1
	1207.83	6879.45	6235.04
	445.03	6311.02	2334.28
	1185.08	402.995	8550.43
	5152.94	4049.23	812.546
	615.097	2308.83	8527.68
	2530.96	8648.39	11307.4
	652.119	3722.59	19327.9
	300.8	6579.42	2363.59
	1520.58	2149.18	20852.4
	397.21	9766.74	20815.4
	3405.21	5023.74	3189.64
	505.19	5975.89	3763.09
	2554.87	649.419	16800.1
	4902.65	4582.57	11350.6
	721.149	7875.95	6077.7
	2400.61	12814.1	7719.76
	1606.97	4138.7	20273.2
	4035.35	5105.12	8555.06
	2874.95	1835.27	5601.82
	2389.05	3267.54	18769.2
	561.493	12358.2	12875.4
	492.464	584.632	7764.11
	894.687	20893.3	13813.3
	1235.98	12979.1	30076.5
	477.038	3824.02	3684.8
	3333.09	13754.3	46335.9
	354.79	627.052	11239.1
	419.192	915.512	18686.6
	1836.04	6606.42	12612.4
	1054.34	14499.3	21424.7
	392.197	3503.16	21280.8
	1562.62	6874.05	7970.04
	570.749	19372.3	11074.5
	3055.05	4350.8	2637.4
	2791.27	6889.86	8469.83
	1048.94	5503.87	2365.91
	608.156	12415.3	11754
	3057.75	3058.9	9406.94
	492.849	28105.9	1897.74
	3742.65	711.508	3384
	1963.68	11607.8	14664.8
	606.228	16560.6	9887.45
	1547.96	12475.1	34102.6
	592.345	10457.4	18991.7
	666.773	8290.9	1582.29
	1227.88	3350.45	804.447
	1999.55	5340.36	6682.77
	2881.89	8322.9	10278.1
	567.278	1245.23	38691.4
	1125.3	1678.69	21273.1
	406.466	1320.05	4520.87
	3078.96	7670.01	9999.67
	268.02	3881.48	23394.9
	769.354	4669.73	16037.3
	1289.58	1329.69	830.671
	537.584	839.926	569.977
	1385.99	20015.9	18655.8
	836.07	11131.1	11050.2
	709.965	3178.07	3594.17
	386.798	3363.95	553.009
	1477.78	8998.16	27673.2
	1350.9	7332.19	1089.05
	3925.82	5696.69	4080.85
	1017.71	3170.36	427.676
	632.451	2346.24	14403.7
	2676.35	2243.27	5198.83
	924.767	3241.7	24921.3
	1124.91	946.363	12839.1
	729.247	599.286	9521.86
	8001.66	1318.89	6880.99
	1451.17	8976.57	4840.57
	2991.03	6331.07	2783.17
	625.51	785.551	18670
	595.43	5901.08	2755.41
	600.829	2401.77	10468.6
	528.328	15388.6	366.359
	540.283	8612.52	7235.78
	435.003	10209.5	1981.81
	1197.03	18726.7	16655.8
	1221.33	5212.32	10219.1
	2023.46	18574.8	20096.9
	1144.97	4234.72	15446.5
	674.486	10975	14360.9
	323.553	1396.79	335.893
	430.761	4232.02	2092.49
	885.432	595.044	18362.3
	2928.56	8764.08	39136
	954.847	636.308	14298
	790.178	6704.75	8491.43
	1534.47	9921.39	1293.44
	1564.55	10483.3	29296
	1894.27	23706.9	3055.43
	2436.86	5699.39	1724.59
	531.028	11728.5	11904.4
	1851.85	2411.8	4613.04
	455.442	16833.2	12445
	612.784	19867.1	7622.97
	305.042	793.264	17718.3
	713.436	8247.32	25912.4
	3590.7	1284.96	14601.1
	2046.21	785.165	6993.98
	841.854	2831.76	692.226
	1297.3	3704.47	2940.9
	2338.53	1535.24	1079.02
	2310.76	15234	26170.4
	4845.97	4114.79	719.992
	288.074	6268.59	8986.98
	413.407	12531.8	6544.71
	1819.45	8054.5	10907.9
	1132.24	11067.5	8727.83
	1575.73	5351.93	3930.45
	2102.9	4921.16	24122.2
	1335.47	6926.11	1709.16
	5597.19	5742.19	1641.29
	730.79	659.06	20350.7
	475.881	4539.38	53503.8
	3205.83	1259.12	812.931
	670.63	3482.72	18673.9
	3314.2	1336.25	1185.46
	4051.54	912.041	4810.1
	833.756	1102.16	11742.4
	1079.8	13665.2	6320.66
	422.663	15141	16861.8
	586.56	5921.9	2330.43
	1122.6	11603.5	1608.51
	2622.74	775.524	14558
	1237.91	10939.5	1326.22
	1428.41	442.33	13052.8
	1751.58	1372.5	3281.42
	2372.08	14137.2	34000.4
	945.592	958.704	2490.08
	2069.35	509.432	2879.2
	1758.91	1859.56	1487.8
	426.519	9346.01	26919.7
	1247.16	9730.88	35428.8
	6346.11	6773.78	3460.36
	1284.18	3686.34	2139.92
	1746.95	852.652	7412.41
	1031.59	4358.9	41006.4
	1318.12	21110.8	1281.87
	369.83	15940.9	5883.73
	1245.23	7885.97	797.506
	2024.23	441.559	839.155
	2527.11	22024.3	28199.2
	355.947	6069.22	18835.1
	573.063	4314.55	29913.8
	704.952	5589.48	940.578
	705.723	559.179	20812.3
	767.811	3669.76	1457.34
	3357.01	2291.48	14630.1
	788.636	8290.51	25760
	3470	18285.5	23905.5
	662.531	6558.21	16957
	580.39	10393	7792.65
	970.658	7361.11	787.479
	570.749	3727.61	698.781
	10688	4369.7	4097.82
	1007.68	11759.7	1033.9
	1727.67	7321.01	669.858
	3016.1	738.117	7973.13
	1067.07	1461.96	4217.37
	1498.6	11403.8	13069.8
	323.167	543.754	1422.63
	1114.89	7015.58	830.285
	721.149	4161.07	14104.8
	2701.41	2823.66	14315
	362.888	3067	3838.28
	2861.84	18569	1760.07
	660.217	9574.31	6305.23
	4316.48	1893.5	8911.39
	321.239	15652.8	3348.14
	3839.44	863.065	24710
	3612.68	3168.04	393.354
	1441.91	6422.85	9115.78
	694.925	10962.2	4575.63
	1006.14	6769.93	30952.3
	558.023	4573.7	15467.7
	709.965	655.204	1045.47
	612.012	1672.53	18616
	605.456	3410.61	24514.4
	2927.4	3532.86	19601.4
	1577.66	5739.11	17606
	966.416	24946	50549.1
	625.51	5657.74	4897.64
	930.166	1729.6	445.415
	5170.68	681.813	5178
	3571.81	2985.63	1222.87
	557.637	11845	4630.01
	650.191	6218.85	17325.7
	515.988	7322.94	16547.1
	2676.35	5278.27	704.566
	355.947	4267.5	25972.5
	1075.55	477.809	14120.2
	650.191	10290.4	9843.87
	1970.24	3793.94	5447.56
	578.462	5817.78	24661
	4383.97	16859.8	13359.8
	6603.33	11857.3	12995
	585.789	1550.28	11272.7
	575.376	8119.29	10706.9
	1952.12	7721.3	18446
	1672.14	7622.97	49900.8
	454.671	2668.64	20021.3
	721.92	1773.18	1483.95
	2263.71	1369.03	3310.73
	7186.03	8919.49	36404.1
	3866.44	6081.94	13710.7
	340.135	13251.4	6468.36
	2488.93	3175.75	923.61
	2683.29	3314.2	21928.7
	1170.81	3700.61	573.448
	573.063	4859.85	12426.5
	3450.33	7728.63	18570.2
	1031.2	8876.68	30605.2
	3776.58	7396.21	6277.85
	492.849	5598.35	8539.25
	902.4	22197.1	13861.5
	541.44	446.572	913.969
	1524.44	5249.35	6460.26
	2382.49	1582.67	2406.01
	8664.2	352.476	17351.9
	778.609	2599.61	1186.23
	432.689	896.23	1960.6
	370.987	11467.8	603.528
	236.784	17400.9	18414.7
	2757.33	9674.96	11093
	4660.47	8317.5	1109.88
	241.411	4279.46	14898.5
	495.549	2469.64	20600.9
	543.754	1253.72	3752.67
	628.209	7429.76	20160.2
	2444.96	18502.3	14691.4
	4944.69	2316.16	37534.8
	1890.03	558.794	20352.2
	569.977	7085.77	4579.1
	977.214	30720.9	1787.45
	4350.03	7931.86	37099.4
	1052.8	11164.7	9851.97
	818.33	9988.87	1501.69
	267.635	7068.41	10179.8
	9236.87	520.23	10450.9
	275.733	15544.4	394.511
	1856.86	12646.3	962.946
	1765.46	5086.6	37283
	2439.18	7997.04	13028.5
	2801.68	989.555	16301.4
	3745.73	3524.37	953.69
	809.46	5239.32	5265.93
	344.377	10492.1	32667.7
	1030.82	7742.9	1294.21
	2578.78	10275.8	8823.08
	1558.76	6287.1	13475.5
	905.485	2106.76	474.338
	1893.11	1001.12	7200.3
	369.058	5928.85	26816.3
	1042.77	19242.3	9116.94
	5513.9	2824.82	3370.12
	814.859	4540.54	60573.8
	1901.21	529.099	20721.7
	1527.91	3511.26	39916.9
	2827.91	2714.91	1347.43
	837.612	13799.4	23083.7
	632.451	16676.3	11650.6
	770.125	9148.18	2767.74
	1632.42	7794.58	1465.82
	2121.8	1945.94	672.558
	3331.17	7120.09	45931
	3218.95	1755.05	14958.6
	293.473	7341.83	1874.21
	875.405	689.526	463.926
	1304.24	1579.2	2371.69
	498.634	2335.06	686.055
	490.535	2394.83	5838.6
	1463.51	690.297	4189.99
	2155.73	7722.85	23942.5
	2702.96	9270.42	1080.95
	280.747	10351.4	1556.45
	1402.96	3165.34	15198.5
	1485.49	3619.63	48126.1
	704.566	6795.77	5758.78
	3013.4	1644.76	2553.33
	2505.89	2833.69	3730.3
	2105.99	4026.48	77930.3
	358.646	1218.63	1478.93
	304.271	17051.9	3624.25
	486.679	4535.14	1207.44
	1552.59	5042.64	1402.19
	319.311	8173.27	467.397
	215.573	9083.77	3012.24
	1360.16	11683	6373.49
	1036.22	528.328	7902.17
	7465.24	1535.24	5228.14
	940.578	10025.9	14206.6
	1442.3	806.375	8642.22
	1309.64	7417.42	2296.49
	499.791	8636.05	7532.34
	1164.64	14851.4	835.684
	1556.83	9672.26	5340.74
	3159.94	8104.25	16810.1
	1323.91	11877.7	14686.8
	843.011	7177.16	29292.5
	997.268	1709.55	834.913
	532.185	7550.85	7204.16
	1212.84	7805.37	7904.48
	5081.59	544.911	298.1
	1492.05	1017.71	7072.66
	3612.68	14607.3	456.985
	225.6	2301.12	5904.55
	570.749	5025.67	1617.76
	761.641	7905.26	1040.85
	1107.17	2107.91	8667.67
	479.352	645.177	44890.5
	509.046	12495.5	1436.9
	1260.66	7507.66	13622.8
	6486.1	11236	8447.85
	336.665	2033.87	13686
	641.321	3464.6	3977.5
	393.739	2864.16	536.812
	1717.64	9278.91	1045.09
	440.788	3753.06	10866.6
	483.979	19556.2	18933
	723.463	7126.65	425.748
	1404.89	931.709	12445.4
	2077.83	2327.34	719.22
	766.269	1452.71	9044.05
	3356.23	14840.6	16592.2
	680.656	10064.5	5871.77
	817.559	15527.5	5164.12
	365.202	3112.51	7221.13
	880.804	1171.19	4532.44
	1858.4	1933.22	12670.2
	186.65	1921.65	16525.1
	1686.02	4188.83	20818.4
	2242.5	1462.35	20254.6
	1130.7	442.33	10937.9
	628.209	2051.61	19552.4
	841.854	6285.56	18727.5
	832.599	6058.42	43044.9
	676.414	9366.45	11894.7
	1874.99	8480.25	7912.97
	773.981	681.042	22747.8
	6592.53	7701.64	10733.2
	347.463	6273.61	17350
	881.575	13341.6	3393.26
	1308.87	8051.8	3249.8
	2081.69	3351.99	4729.5
	333.965	753.928	11331.7
	401.067	15948.2	6574.79
	1563	9483.3	5758.01
	1343.57	1175.82	19882.5
	571.134	3591.86	10550.8
	1704.15	6822.38	7840.08
	790.95	1166.18	23959.9
	3431.82	7143.23	14268.3
	581.932	1346.27	4393.99
	547.996	4532.82	5602.21
	846.482	676.029	12051.3
	2302.66	984.541	6176.04
	634.379	6260.88	27265.2
	394.511	10408.1	11413
	1232.51	583.475	22228
	842.24	15991	3721.05
	292.316	689.912	11723.9
	4240.51	6387.76	649.805
	702.252	22330.9	24310.8
	1738.86	10835	11281.9
	613.555	3546.74	6331.84
	552.238	22312.4	8564.32
	1077.48	4724.87	2368.61
	1000.35	3820.93	1167.72
	419.192	5557.86	22972.2
	2925.47	9631.38	586.174
	396.439	712.279	20041.4
	815.631	1878.84	357.104
	1518.27	18044.9	24801.7
	808.689	1316.96	13318.1
	660.217	8740.55	10471.7
	390.654	7998.97	10808.8
	736.96	2419.9	12300
	635.536	6793.84	6887.55
	1165.79	16805.1	3160.71
	2271.81	1175.82	3628.11
	984.927	1983.35	2244.43
	697.239	6868.65	1820.61
	788.636	453.899	1433.81
	957.932	1309.64	4682.45
	5378.15	1492.43	8940.7
	1174.28	2516.31	15420.6
	769.739	3033.84	9828.45
	11312.4	10545.7	14664.8
	2574.54	6985.11	12963.3
	4541.31	1190.86	881.961
	615.097	3320.76	12361.7
	1000.35	4393.22	7193.36
	300.414	12543.8	27576
	2981.39	2246.74	24235.6
	2529.42	3013.78	18614.1
	581.932	5740.65	2075.52
	791.721	2172.7	612.784
	746.215	5831.28	22010.8
	784.779	2288.78	1418.39
	1687.18	1785.13	15798.5
	357.875	794.42	1872.67
	4733.36	8808.43	10353.3
	430.761	13116.8	23033.2
	5054.21	2251.76	4528.58
	490.921	13185.1	7704.72
	394.125	1547.58	4888
	4065.43	3132.18	5207.31
	4316.48	2328.89	19585.9
	3132.18	7291.31	2991.42
	2152.26	1116.82	13917.8
	1629.33	6084.64	901.629
	5375.84	5036.09	42659.2
	1176.59	715.364	14905.8
	1724.2	8902.52	15851.8
	753.157	4545.55	12417.2
	556.094	909.727	6076.93
	5054.6	505.961	14143.8
	410.708	16910.7	6475.3
	1830.64	16581.8	34663
	3601.5	5080.82	956.004
	1580.36	11797.9	5164.5
	1792.46	2546.39	17788.5
	7435.16	6235.43	25166.5
	754.699	1281.48	9027.47
	3778.9	1411.06	7671.56
	2592.66	9490.24	18505.4
	531.028	1796.32	770.125
	390.269	9311.69	39003.3
	3254.81	910.113	18444
	1340.1	900.857	725.776
	1146.9	1585.37	11310.9
	2342.77	573.063	26003.4
	5557.09	11135.8	777.067
	386.798	4427.54	48532.2
	664.459	301.957	28343.5
	2458.46	2421.44	29460.3
	4903.04	2644.73	5950.44
	5547.83	3648.55	939.036
	1009.22	3847.93	36775.1
	558.794	3628.11	35212.9
	986.084	3795.86	19732.9
	3501.24	3200.43	11716.9
	5026.06	281.132	16854.8
	4495.8	2387.5	4044.6
	6478.38	879.261	1063.98
	2311.92	2543.3	2208.57
	11915.1	3599.57	8471.76
	1329.31	6290.19	8253.87
	723.077	5290.99	8381.14
	3189.25	350.162	6082.72
	2737.28	10673.4	15096.7
	778.609	45643.3	18104.7
	1858.4	411.093	19486.8
	9997.36	9065.65	1199.73
	2234.4	447.729	24307.7
	7534.27	273.034	32440.9
	1388.69	805.604	4227.4
	9405.4	789.407	12215.2
	7560.88	733.104	6287.88
	5075.04	1219.01	474.338
	4105.15	10624.4	6225.79
	19255	13039.7	8817.68
	7759.1	12081.8	846.096
	550.695	2579.55	9886.29
	18484.9	6260.11	1084.04
	1783.97	18892.9	2590.74
	1306.55	2681.75	39601.9
	1092.91	28775.8	28196.5
	5351.54	3500.46	15849.1
	652.505	1180.06	4321.88
	2484.3	10163.2	7367.29
	4844.04	1967.93	9996.2
	1226.34	36412.2	1160.01
	667.545	18867.9	17313
	3500.46	1976.02	22797.5
	1011.92	11900.5	4936.59
	1150.75	12042	10013.2
	5700.16	5091.62	2611.18
	2913.13	4520.48	14833.3
	1544.11	2145.71	38243.6
	1761.61	4151.81	10703.1
	1124.53	1783.97	19601.8
	3080.5	2229.78	16456.1
	853.038	466.626	1777.42
	733.489	1695.28	3674.77
	3127.93	4704.05	11723.9
	741.588	12130.7	7675.41
	787.865	981.071	17917.7
	16386.3	17592.6	2202.78
	6773.01	15589.1	1463.12
	1158.47	4110.93	1294.98
	1347.04	1971.01	1219.01
	2190.05	3827.49	6311.79
	8851.62	8135.48	4279.84
	875.405	3449.17	25544.5
	1206.29	2157.66	21826.5
	943.278	23275.8	15295.3
	478.966	449.272	276.119
	850.724	18635.7	45212.6
	428.447	4954.72	3275.25
	2048.14	4617.28	30571.3
	7127.42	12573.4	21807.2
	1099.85	6497.28	22470.5
	4144.87	3959.76	1352.44
	2340.84	556.866	13309.2
	2466.95	2525.95	749.3
	1258.73	11614.4	1456.95
	2905.42	2511.68	49998.7
	13971.4	1923.19	14986.4
	2138.76	13710.7	13144.2
	6666.96	17325.3	10026.7
	2236.72	3728.38	20305.9
	6592.92	3332.32	640.55
	13379.4	393.354	18775.7
	800.591	445.415	4248.61
	1881.93	287.303	1496.29
	289.231	3187.71	19565.5
	912.812	2775.84	5808.91
	2531.35	4654.69	67459.8
	641.707	2540.6	22827.2
	9561.97	659.446	5999.42
	695.696	903.943	24752.8
	686.441	4711.38	18999.8
	5362.34	4355.81	963.717
	1809.81	441.559	9325.57
	2134.52	1101.39	1680.62
	1689.11	4689.01	23774.4
	5677.41	392.968	11447
	20429	914.355	658.289
	8123.53	1516.73	2404.86
	1354.76	6657.32	1964.07
	9939.51	973.744	22441.6
	1342.03	6525.82	26458.8
	28462.2	2123.72	460.841
	16240.5	1115.27	2572.61
	1755.44	3113.28	566.507
	629.366	2304.59	7323.32
	1281.1	380.628	26136.8
	4607.64	3637.75	230.613
	1101.39	531.413	3522.45
	1893.88	380.628	33013.6
	522.929	7440.94	2809.78
	685.67	1269.14	2524.02
	1024.26	1992.99	1610.82
	8873.99	9521.09	7078.44
	5876.4	657.132	29125.9
	479.737	2126.81	21364.1
	6288.26	2800.14	18284.8
	2771.99	2627.76	302.728
	13819.5	8391.93	21575.8
	390.654	4091.65	1996.46
	813.317	859.594	1079.02
	1199.34	2716.45	14249
	448.886	1175.43	24133.4
	564.964	6020.24	4202.72
	764.726	4859.85	6171.41
	1193.94	1573.8	26198.1
	886.589	5007.16	11649.4
	720.377	11443.1	10735.9
	1226.34	880.033	13055.5
	5962.4	1306.17	7978.14
	461.998	6523.12	16763.4
	1031.2	7020.59	386.798
	1192.4	577.69	6508.08
	6503.84	544.525	3053.12
	484.751	7540.05	4959.73
	1133.01	12654.4	43525.4
	782.08	14476.2	11482.5
	605.456	9742.83	17058.8
	1268.37	3589.16	19317.5
	5729.08	2650.51	13716.5
	1507.47	12513.3	17383.2
	3645.85	4355.04	514.831
	1007.68	2377.09	3112.12
	9332.9	19580.9	9593.59
	490.535	1638.59	3287.97
	771.282	721.92	9568.91
	4031.11	1505.16	463.926
	850.338	3148.37	667.159
	3585.3	6030.27	24230.6
	379.471	5344.98	4738.76
	849.181	11202.9	2161.13
	1273	9858.53	23556.5
	2234.02	18294.4	14820.6
	4392.45	8742.87	14257.1
	1593.85	15664.4	7038.72
	5070.02	10191.7	318.539
	437.703	7003.63	10685.7
	961.403	8623.32	1550.66
	498.634	2388.66	24772.4
	900.472	7548.54	7883.27
	7019.05	10728.9	14257.1
	15557.5	1876.14	870.006
	3453.41	686.827	8863.19
	580.775	18424.4	4928.49
	7651.89	4289.1	789.793
	949.448	12261.5	2626.6
	3082.81	11664.5	14316.9
	2386.73	5077.35	706.494
	247.582	3719.12	3544.81
	1806.34	18579.4	458.913
	928.624	18838.2	6177.2
	1574.96	8804.95	1347.82
	6236.59	2446.12	13306.2
	4634.63	4364.3	443.487
	5653.11	3092.07	12082.5
	5527.01	28606.5	19230.8
	1197.8	8076.09	7076.9
	12791.7	9570.84	17300.2
	1227.88	1787.45	7391.58
	2065.11	10170.9	10355.6
	5241.63	15835.2	4093.58
	11775.2	1239.45	23076.4
	3935.08	6675.45	6705.91
	1881.93	11899.3	1433.43
	693.383	7529.64	15217.8
	40130.2	17053.4	9960.72
	11247.2	12259.1	15514.3
	2718.77	21433.9	2272.58
	1113.73	1298.45	15053.1
	19918.7	4987.49	949.448
	4297.2	518.687	2422.98
	6218.85	2933.57	380.628
	3764.63	930.166	654.433
	1771.63	7273.96	9143.93
	277.662	8121.98	511.36
	1622.39	598.129	20375
	1940.55	545.682	9499.11
	995.725	11049.8	9642.18
	9816.11	5718.67	16496.6
	9575.08	9980.39	9948
	940.193	1015.39	5091.62
	4295.65	13548.3	15800.1
	1527.14	875.405	774.753
	842.24	6907.99	2630.07
	2660.15	8070.69	1755.82
	11113	17229.3	14655.5
	704.566	17211.9	11408.8
	996.111	13610.4	507.504
	16200.8	9303.59	374.457
	23715.4	585.403	412.636
	1220.55	7646.49	15510.1
	2318.86	3281.03	7011.73
	3571.81	15899.2	10775.2
	6011.76	20079.9	1102.55
	4222.38	11892.8	8222.64
	1182.38	8271.61	6867.11
	2372.46	1394.09	640.55
	7478.35	12583.5	6391.23
	711.122	2450.36	5806.98
	1093.68	15604.6	894.687
	557.251	1622.01	674.872
	1207.06	3414.08	13328.5
	1518.27	8569.33	642.478
	703.409	656.747	22418.5
	1244.85	3136.8	16562.9
	2732.65	8201.81	11196.3
	8328.69	8233.05	11100.3
	886.974	12381.4	1369.03
	2570.68	658.289	4841.72
	2507.44	940.578	10286.2
	1045.47	878.876	6607.57
	3758.84	5127.87	13530.2
	1872.67	7134.36	21140.8
	521.772	2722.24	35976.8
	1735	1033.52	21130.8
	5327.63	2198.15	21059.1
	416.878	944.82	46487.9
	668.701	6063.82	25678.3
	1468.91	1169.26	13655.9
	1891.95	15705.2	17286.7
	407.623	1175.82	9512.61
	4985.95	1987.21	1027.35
	1191.63	16159.1	556.866
	1885.78	21616.3	27922
	7196.06	17696.3	3240.54
	7668.47	351.319	2372.08
	1043.55	14878	22071.4
	919.754	18797.7	1098.31
	2136.45	8101.55	8605.19
	25784.7	967.959	9127.74
	728.09	504.804	19009.8
	322.782	5633.83	12636.7
	462.384	3527.07	13195.9
	554.937	14010.3	1310.02
	1642.44	12954.8	28354.3
	1133.01	3987.53	911.655
	334.351	17969.3	18038
	630.523	13591.5	562.265
	435.003	399.138	40339.2
	5483.43	2733.42	804.833
	777.452	328.952	1698.75
	3170.36	7914.9	885.432
	5332.26	6063.43	910.498
	1942.09	12251.8	42533.5
	446.187	2748.08	27111.3
	8058.74	544.139	8671.14
	5556.7	9836.16	797.891
	1466.98	516.759	12265.7
	678.343	5917.66	1929.36
	4758.04	20457.1	1436.13
	5697.07	21574.7	24674.1
	3591.86	1468.52	19136.7
	1672.53	14310.8	637.85
	6859.01	1048.94	369.83
	635.536	2372.46	14796.7
	1987.98	9684.99	1456.18
	3773.5	7089.62	1084.81
	423.434	1310.02	17026.4
	301.186	680.656	3031.52
	7154.03	632.451	14517.5
	10932.1	8915.63	21928.3
	1127.23	25675.2	15715.3
	1397.56	1985.67	2433.39
	7579.77	3097.47	1689.88
	4356.2	546.068	1647.07
	1043.16	4131.37	2121.8
	651.733	1189.7	40733.7
	1145.74	568.82	8276.24
	3332.71	14887.7	41918.4
	6870.19	5033	16459.5
	15039.6	1862.65	20739
	458.142	4626.92	26290.7
	6988.2	4044.22	14370.1
	2732.65	610.47	3845.61
	673.715	4130.22	2898.48
	466.626	600.829	4195
	386.027	6918.78	7611.01
	827.2	992.254	22081.4
	446.572	1038.53	13525.6
	3535.56	5023.74	5138.67
	11588.9	348.234	2258.31
	1950.19	3999.1	5598.35
	608.927	9980.39	3177.68
	780.537	5336.89	27205
	673.329	12116.8	3837.51
	605.456	1793.62	1715.33
	3287.97	15129.1	4566.38
	303.885	7453.28	14038.5
	4438.73	575.762	1135.33
	9231.86	9632.54	13087.9
	1025.81	736.574	26413.7
	2105.21	2151.88	3185.78
	1616.22	544.911	824.886
	629.366	1431.88	15028
	655.975	4613.42	13685.2
	2935.89	12904.7	7866.31
	530.642	660.989	1827.17
	1749.27	5294.08	40781.2
	1593.08	7938.42	702.638
	433.075	888.131	25088.7
	1028.12	635.536	2309.22
	532.956	1456.95	1057.43
	890.831	1380.6	936.336
	2844.49	17077.3	8089.59
	403.38	2129.89	9308.6
	11789.4	10910.5	15573
	1071.31	1900.05	19836.2
	17933.1	8033.29	621.268
	6733.68	1755.05	10105.7
	796.349	9447.05	5046.5
	5671.24	4267.12	2796.67
	515.216	1149.21	10406.1
	586.56	913.198	11573.1
	360.574	12366.7	18451.4
	807.918	2805.54	3281.8
	757.399	1061.67	7717.06
	3898.06	4439.11	15709.5
	6061.89	5664.68	4436.03
	1038.15	8564.7	988.012
	3969.79	2667.48	1990.29
	2961.72	7358.42	1719.96
	1561.08	3664.36	21079.5
	5289.07	1175.43	9172.47
	939.807	2025.39	1320.05
	1557.6	5855.57	1571.87
	1429.19	6244.3	9021.69
	6821.99	432.689	1615.84
	1514.03	7763.73	15680.5
	5441.4	5577.14	2652.44
	3269.08	2048.14	3233.99
	5687.43	8980.42	7852.81
	2023.84	6222.7	5946.58
	503.647	6286.72	543.754
	6181.44	12784.4	1262.59
	3563.32	5014.88	2527.11
	1067.07	8854.7	33752.5
	3542.88	6376.57	13547.6
	1129.54	4563.68	11382.6
	5943.5	6080.02	14036.6
	254.137	10814.1	14328.1
	632.066	1840.28	1929.75
	2929.72	7781.08	3840.21
	5453.35	1984.51	2161.13
	4849.05	8716.26	11206.7
	590.802	11364.5	468.939
	2060.87	8893.65	2295.34
	699.167	8506.47	9037.5
	1131.47	6577.49	6882.92
	1426.49	8666.9	22359.8
	1080.95	9107.3	5889.9
	6173.73	6449.85	1082.49
	5650.41	7682.74	18269.7
	12094.5	2321.17	945.592
	5798.5	12873.9	711.508
	1753.12	7878.26	26869.2
	11936	966.416	8390.01
	16655.5	5422.88	7408.55
	1041.62	1537.94	689.526
	642.478	9138.53	16145.6
	551.081	948.291	6648.06
	2942.44	13649.8	14130.3
	5135.97	11567.3	1888.1
	2463.09	10686.5	618.954
	10916.3	8261.2	3186.17
	17617.6	2862.61	24550.7
	3753.06	2282.22	10806
	509.046	10123.5	10973.4
	1139.95	11782.5	15565.6
	17178	6532.76	9613.64
	1994.92	1770.48	12835.3
	1510.17	5539.73	29397.8
	658.289	9360.66	1439.21
	938.65	10932.5	11733.9
	5616.09	7507.27	5632.29
	3180.38	9177.1	1755.44
	3770.8	3921.2	32252.7
	6086.57	755.856	1763.15
	691.069	2256	1281.1
	4958.19	7216.11	15472.3
	1930.9	2958.64	530.642
	5415.94	12213.6	5414.78
	1328.92	10082.2	835.684
	1296.91	6974.32	21338.3
	4352.73	1876.91	1570.33
	4154.12	1328.15	495.934
	11239.9	9489.08	507.889
	6488.02	6772.63	1058.97
	1722.66	7227.3	17134
	1062.44	10833.4	3972.1
	7564.73	1424.94	9912.9
	924.381	6334.15	5901.46
	4501.97	1863.8	19488.8
	9155.12	5176.85	217.887
	761.641	13967.9	1389.08
	2885.37	16314.9	308.898
	1676.38	1128.39	10205.6
	900.472	296.172	9707.74
	1583.44	551.852	19872.8
	9649.51	931.323	591.959
	1096.76	1762.77	8889.8
	4188.45	5813.92	30308.7
	1261.43	6141.33	1122.6
	1764.31	2908.5	26264.1
	962.174	2002.63	13544.9
	7410.86	5562.87	10979.2
	591.959	7793.03	12969.1
	2515.54	8555.06	7356.49
	494.392	16114	5870.23
	494.777	1682.94	8745.95
	5720.6	3662.43	7413.95
	1724.2	363.659	6147.12
	20563.5	1048.17	25423
	2817.11	13454.2	613.94
	1076.71	10553.5	4119.42
	763.184	2149.56	8096.53
	13959	1245.23	1064.76
	2194.68	2765.05	2367.45
	10356.4	11710	8304.39
	33647.9	3901.53	6200.72
	2524.41	17102.4	692.997
	825.272	554.166	23091.4
	17453.7	7988.94	3026.12
	1263.75	19670	1220.55
	704.566	1063.98	12179.3
	585.017	1973.71	1571.1
	8876.3	18205	16687.5
	900.086	1347.43	4372.78
	772.439	11539.1	773.981
	1837.58	1314.65	564.193
	1948.26	6486.48	2648.58
	908.57	6140.18	605.842
	975.672	1484.33	18665.4
	24583.8	1226.34	9883.59
	402.995	12551.5	7012.5
	2632.39	4515.47	17756.1
	743.901	683.356	13881.1
	4702.12	1670.98	15455.3
	411.093	11478.2	8350.67
	780.923	15010.3	16579.9
	964.103	8710.09	8008.99
	800.976	6485.32	1836.04
	3756.53	1200.12	19851.6
	3765.01	2992.57	19979.7
	913.969	3272.93	9925.24
	682.199	4993.28	15031.9
	2804	27093.6	29131.7
	569.977	5232.38	21079.1
	921.296	20342.2	5678.95
	3082.04	3311.89	554.166
	2355.88	419.577	5834.36
	6167.94	16892.6	13317.3
	524.086	13198.2	10365.6
	778.224	713.436	1234.05
	762.027	3915.8	31294
	5042.64	8352.6	11133.5
	692.997	2396.76	9540.37
	900.086	2410.26	7590.96
	6105.47	691.454	2005.33
	6860.55	4454.15	17535.5
	1858.79	6333	13127.2
	18323.3	3370.12	14252.5
	2294.95	2475.43	993.797
	520.615	6933.82	15186.5
	1221.71	1326.22	10430.8
	586.174	2547.16	1040.46
	2060.48	1859.17	24283
	558.794	397.982	16674.3
	1633.96	826.429	1413.76
	426.519	1814.06	11922.1
	961.789	578.076	1108.33
	551.852	386.027	6751.8
	945.592	18761.4	623.967
	447.344	1571.1	3134.88
	5346.53	495.549	13452.7
	963.717	1292.28	4793.52
	1203.2	748.915	1592.7
	10994.2	8698.9	18320.7
	888.131	577.69	8773.72
	827.971	11604.7	11799.1
	2984.48	578.076	1148.44
	1727.67	1884.24	4053.47
	3986.76	2694.47	7396.98
	2879.2	4482.31	23580.4
	2841.4	8266.6	21079.1
	1195.87	3356.23	33774.4
	3708.71	9894.39	1914.71
	456.213	2987.56	903.557
	986.084	406.466	18509.6
	1368.64	5184.17	21773.3
	3640.84	5649.64	11081
	1364.01	2611.56	7876.33
	5840.92	517.145	31102
	10027.8	11923.6	778.995
	612.784	807.147	731.175
	3427.19	3807.05	5663.52
	1045.09	12805.2	18073.1
	26503.2	4101.29	22118.4
	6848.21	1381.37	962.56
	1731.53	545.296	19714
	2128.74	18522.3	12448.5
	3795.09	1201.66	2900.02
	1387.54	3388.63	1844.13
	3853.71	1886.17	12108
	26798.6	2712.6	1082.11
	246.039	2411.8	9886.68
	1431.5	3202.36	3336.18
	1306.17	1837.58	31533.9
	9338.68	7389.27	1285.34
	5374.68	4911.14	29276.7
	525.629	7413.56	10789.1
	535.27	495.549	2652.05
	2025	2536.75	34976.5
	747.758	4663.56	1000.74
	1264.52	7888.67	2654.37
	916.669	6243.14	16058.5
	3599.19	5980.91	682.97
	8632.19	673.329	59142.7
	638.236	2819.81	3043.09
	1112.19	716.135	16134.1
	15232	377.157	11602
	12204.8	3931.61	7673.1
	1066.3	257.608	9898.25
	2552.56	576.533	43182.9
	8610.21	1282.26	22838.8
	661.76	1087.51	9740.91
	384.87	442.716	16055.4
	7584.4	814.859	16067.7
	1527.52	1420.32	2785.49
	1973.33	3317.28	16314.2
	673.715	2593.44	1396.41
	732.718	775.524	49350.1
	1573.8	8552.75	12457.4
	1357.07	2849.12	28075
	1436.13	2009.96	16148.7
	2613.49	2623.9	18184.1
	1475.08	2389.82	841.854
	267.249	11151.6	4017.22
	821.03	5539.73	10027.4
	1078.64	4615.35	4138.31
	799.819	2762.35	1292.67
	1691.42	4918.08	1735.77
	1390.24	8819.22	5313.36
	5930.77	5665.84	6969.3
	4323.04	1645.14	7885.59
	532.956	19634.1	6977.02
	7915.28	5642.31	10880.9
	780.923	721.92	939.036
	5446.79	4714.85	10110.7
	3796.64	15036.9	26187.3
	2564.51	1510.94	6501.52
	2568.76	4832.85	39134.1
	946.749	9755.95	9191.37
	1161.16	757.785	29215.4
	8965.38	21263.9	9551.17
	27916.9	4594.91	21287.4
	1992.22	17109.7	672.172
	6421.31	16492.3	1572.26
	1292.28	2915.83	13497.4
	256.066	991.483	2309.6
	2085.93	15733.4	15832.9
	4299.9	1228.27	2849.5
	8674.99	16176.1	1805.96
	12105.7	354.018	3542.88
	4471.89	2852.59	1448.08
	1833.34	4237.04	37415.3
	17966.2	9583.56	22606.3
	3174.6	4788.12	13235.6
	1800.56	13716.5	11757.4
	3168.81	2256.39	6156.76
	2954.78	14456.5	856.509
	809.075	508.275	3983.67
	1862.65	15705.6	5066.55
	2787.03	8245	1298.07
	3892.66	1794.39	11733.1
	3785.84	7914.9	18950.8
	11740.1	4004.11	17190
	1405.66	691.069	13797.1
	6752.96	8384.61	9776.77
	982.613	483.979	45371.4
	517.145	1423.02	8755.98
	374.457	1984.12	37165
	2425.68	2575.7	3775.43
	1164.64	497.477	2072.43
	10615.9	488.222	1234.82
	354.79	6740.62	5908.79
	3651.64	11821.8	23129.2
	5511.2	2692.16	27186.5
	6734.45	5736.41	6289.81
	493.62	5506.95	27424.9
	4402.48	6266.28	11383.4
	2246.74	7111.99	5562.49
	751.229	1519.43	28055.8
	725.776	1176.98	64576.7
	1442.3	2198.15	17321.8
	956.775	6314.49	32219.9
	1476.62	2577.24	7243.49
	11423.1	6735.99	2073.59
	2386.35	7819.26	29376.6
	6864.8	2615.03	19819.6
	574.991	15398.6	31775.3
	2011.5	3387.09	14427.2
	377.543	9269.27	22700.4
	399.524	7200.69	9563.51
	2991.03	1620.08	26397.1
	6177.97	4818.2	827.971
	6185.3	3906.16	41715.6
	1745.8	1744.25	36625.9
	393.739	8862.03	1691.04
	6065.75	9070.66	36689.1
	519.073	2426.45	458.142
	1172.35	1128.77	1181.22
	5889.12	2970.21	19257.4
	883.889	581.932	4237.42
	2372.46	2173.47	33073.7
	936.336	5810.45	12342
	3223.19	6162.16	32476.8
	11517.2	3863.35	16603.8
	1831.41	482.051	1994.15
	2171.93	2045.05	29663.5
	5233.15	8728.6	6296.75
	2065.49	4217.76	9106.14
	927.852	744.673	14613.1
	1928.2	5266.31	7343.38
	3340.81	3829.8	7224.6
	6161.77	290.773	2734.2
	255.294	7484.91	1513.64
	7081.91	4065.81	15313
	5649.26	3828.26	5353.47
	7870.93	4543.24	1685.64
	6425.16	1296.91	10169
	2903.11	3073.56	9388.43
	573.448	1890.41	31899.8
	5177.23	431.918	3196.58
	1854.55	728.09	19414.7
	1439.21	820.258	1488.19
	1607.35	4471.12	4695.95
	485.908	1858.79	3401.35
	3844.45	3075.1	715.364
	3695.21	1399.11	24347.1
	2769.67	1314.27	38268.3
	876.176	2096.73	3683.26
	4997.52	3287.2	1168.88
	5772.66	1835.27	4667.8
	333.194	3657.03	6379.27
	1947.49	942.121	2460.78
	5772.66	3931.22	2298.81
	4420.6	358.26	3488.12
	6535.84	4465.34	1047.02
	2966.74	1256.03	1214.38
	1574.19	2032.33	1249.48
	1178.13	1072.08	20865.9
	2148.79	4992.12	4832.08
	1955.97	18221.5	15209.3
	1369.03	10227.6	520.23
	4796.6	12167	12838.4
	2021.92	3927.37	23355.6
	694.154	3527.07	12723.8
	1202.43	8352.98	1098.69
	2591.89	5135.58	498.248
	1414.53	2652.05	390.269
	649.419	5904.94	17423.3
	2854.51	2132.59	364.816
	2287.62	5686.28	1493.59
	2031.94	7724	29831.6
	1268.37	2575.7	14800.5
	8211.84	7181.79	297.329
	822.187	7108.14	9828.06
	5600.28	5352.7	20250.8
	821.415	4877.59	3073.56
	5638.07	2654.75	32720.1
	573.448	19791.5	1672.91
	1441.14	13914.3	17807.7
	7295.56	576.533	3860.27
	650.962	8083.81	16945.5
	4043.83	5157.56	2139.54
	2670.95	3828.64	3569.11
	2749.62	1796.32	14220.9
	250.667	984.156	12886.6
	400.681	651.348	15030.4
	1355.14	5952.75	641.321
	6597.93	3054.66	1001.51
	9025.16	2110.61	17589.1
	843.011	4493.88	2235.56
	11631.7	6757.59	20221.9
	1809.81	15738.8	9935.27
	1407.97	28105.9	42325.6
	1295.37	10219.9	17964.3
	4015.68	5024.52	24043.6
	434.617	5351.54	23290.4
	313.14	12934	1234.44
	7907.57	1596.94	23888.5
	905.871	4436.8	10277.7
	3721.82	4121.73	12739.6
	362.888	2409.49	2152.26
	3955.13	4390.52	14710.7
	427.676	5720.21	24692.2
	616.254	4408.65	11109.9
	4202.72	3862.2	2630.46
	851.881	2704.5	11205.2
	7834.3	5164.12	18567.8
	530.642	4375.87	11425.8
	6900.27	6087.34	6742.16
	424.976	1434.97	6647.68
	10253	3234.76	9535.75
	1191.24	5642.7	6195.71
	1926.66	17279.8	18737.5
	1069	7451.35	10218.7
	3314.97	1955.2	8503.77
	1883.09	845.325	33273.9
	2205.09	1955.97	4930.42
	9009.73	9084.16	10846.5
	1293.05	3073.56	9398.46
	1822.92	20547.7	1903.14
	3873.76	4212.36	3141.43
	1034.29	1928.98	14235.5
	5820.09	3033.84	10152.8
	1308.09	7600.21	10053.7
	10462.8	3225.12	8851.23
	790.95	1880	12410.7
	1124.14	1159.62	13413
	1790.53	10187.5	20136.2
	16563.7	11971.1	9924.86
	1955.2	14765.8	21133.1
	1462.35	349.005	9770.6
	738.117	1229.04	1512.1
	11475.9	2841.02	903.171
	2117.55	6193.01	26796.3
	11523.3	6121.28	55984.3
	1181.99	378.699	10327.9
	517.53	741.973	2054.31
	29185.3	1104.48	12841.5
	968.73	648.263	16720.2
	1030.43	6987.43	1206.67
	5593.34	1477.78	43924.1
	693.383	2199.31	7099.27
	282.289	8978.11	4307.61
	1246.39	2629.69	17512.3
	866.535	3805.12	12859.2
	4697.11	3770.8	4486.55
	2391.36	3063.53	18099.7
	633.608	554.166	27055
	1052.41	2831.76	15687.1
	1935.92	3021.88	21476.3
	1410.67	612.398	23140
	563.422	2067.42	7945.36
	7036.41	1639.75	1187
	3781.6	1284.96	24304.2
	16560.2	823.729	6355.75
	6804.64	384.098	14222.4
	4292.18	4542.85	9799.91
	1066.68	2908.5	32590.1
	3587.62	2021.14	30253.9
	986.084	1046.63	25493.2
	804.447	929.395	25548.3
	937.879	677.571	1677.15
	704.18	1736.54	42085.4
	2185.81	1178.9	14967.1
	6928.04	1589.23	5646.56
	564.193	1725.36	23971.8
	2757.72	442.716	1211.3
	2110.23	4345.79	14607.3
	577.69	1789.76	19238.9
	24284.2	434.617	14518.2
	472.41	3484.27	5383.93
	2815.57	10335.6	21686.5
	364.431	518.687	44462.9
	1682.55	9368.76	5648.1
	638.621	4132.14	6947.71
	1117.2	2738.44	29199.6
	296.558	895.458	23487.5
	1650.93	8086.89	24954.8
	1238.68	1855.32	5735.64
	219.044	398.753	3921.2
	1503.61	868.849	1190.86
	3213.93	749.3	2666.71
	5606.83	2364.75	423.819
	1764.31	13843.4	28984
	391.811	4449.14	51247.8
	290.388	10454.3	1950.19
	931.709	6148.27	22438.9
	841.083	4660.09	11757.8
	1429.19	8771.02	19636.8
	653.276	2584.57	17074.3
	6196.86	652.89	4751.87
	771.282	2308.45	4397.46
	1002.67	8291.67	35165.4
	4430.63	5522.77	7564.73
	10773.6	9822.66	925.153
	571.906	19424.3	2132.59
	5064.24	12033.9	18605.2
	5985.92	9231.86	6218.46
	919.368	11756.6	20778.7
	2615.03	2604.62	10354.1
	1978.72	1270.3	6066.13
	902.4	3190.79	1322.75
	1138.8	897.772	4658.93
	1160.78	5052.28	1936.69
	39507.4	1690.65	544.525
	1144.97	25123	593.116
	12963.3	753.157	542.983
	540.669	19344.9	14824
	1941.7	1395.25	2671.72
	5516.6	10129.2	16565.6
	14830.2	3473.08	12560.7
	5623.8	3328.85	1452.32
	451.586	2893.46	5039.56
	348.234	9958.02	529.485
	923.225	8278.94	1009.99
	2221.68	2975.99	892.373
	993.797	5968.57	15953.2
	1285.34	4536.68	505.961
	736.574	3657.03	36614.3
	5040.33	2046.21	18636.1
	3364.72	3092.84	24888.9
	372.529	1059.36	392.583
	1149.6	17812.8	443.102
	1665.2	719.992	6174.11
	6791.52	6411.28	2526.72
	577.305	12261.8	10715
	863.065	2338.53	929.395
	5018.35	7375.38	510.974
	800.976	1176.98	505.961
	954.076	1696.43	3454.19
	858.437	3941.64	1132.24
	14237.9	8287.04	4552.49
	785.551	2932.41	29958.1
	1522.51	4196.55	1565.7
	5215.41	1627.02	2725.71
	4227.78	449.657	16373.2
	10435.1	2139.54	30673.9
	742.359	16028.8	11250.3
	1557.6	4881.44	10724.3
	641.707	1760.07	7545.45
	3543.27	1543.34	563.422
	913.198	3253.27	11784.4
	1374.81	3433.75	357.875
	1635.89	1924.35	650.962
	2719.54	10250	481.28
	525.243	3677.47	21304
	588.488	1436.51	15629.3
	2751.16	3333.09	476.267
	2259.09	5482.66	20547
	1669.83	11389.1	22084.9
	3991	20022.9	14131.8
	7844.32	5862.9	3992.93
	1372.5	3779.28	1266.06
	2519.39	1854.16	29014.5
	914.74	2065.11	3616.54
	8799.56	4122.5	962.56
	11690.7	1429.57	34452.8
	4886.07	484.365	15215.9
	424.205	1225.95	3712.18
	1314.27	4564.83	66357.6
	4389.37	2407.17	15312.3
	1489.35	5135.97	21546.5
	5860.59	2154.19	3110.97
	901.243	5505.02	980.685
	7035.63	2155.35	19698.2
	1794.39	1197.03	13942.9
	1396.02	1379.44	26405.2
	756.628	1382.14	30915.3
	1130.31	11452.4	4468.81
	320.082	7037.95	4507.37
	7845.87	1896.2	30093.5
	905.099	3599.57	15995.2
	501.333	698.01	10420
	16528.2	460.07	1809.43
	11478.2	1663.65	28018.4
	320.082	746.987	4737.6
	582.318	2578.4	2951.31
	1783.2	5376.22	23706.9
	5635.37	4272.52	1213.61
	211.331	10456.3	1917.79
	9167.84	674.872	13897
	22514.1	2539.06	17167.6
	726.548	507.504	973.744
	5410.93	1363.24	1637.43
	3564.86	3731.85	35784
	2411.03	1659.8	730.018
	4267.89	776.295	7631.06
	831.442	2450.36	24178.5
	17518.9	2111.38	1704.15
	697.239	5402.06	526.4
[truncated: 4,450 more rows]

## Sheet: figure 5
	figure_5E							figure_5D
	DSRed	NMNAT1	NMNAT2			siRNA Control	siNMNAT1-1	siNMNAT1-2	siNMNAT2-1	siNMNAT2-2
	516.481	151.707	223.599			1618.88	2412.68	2738.34	3159.57	2243.34
	521.659	161.31	286.256			1339.1	2037.37	3194.41	3631.74	2529.24
	487.804	164.226	275.366			1569.46	1724.23	2897.22	3010.61	2701.5
	541.412	163.833	308.442			1597.91	2266.87	3343.02	2870.37	2260.14
	605.853	160.107	321.187			1691.25	2472.62	3564.26	3024.51	2970.95
	547.264	146.796	217.834			1184.13	2115.07	3297.63	2086	2848.84
	452.19	147.929	350.092			1615.68	2124.96	3684.57	3053.1	2511.58
	398.203	163.833	245.507			1624	2287.22	3863.92	2960.16	2807.65
	485.669	160.107	336.862			1602.84	2360.93	3063.68	3017.97	2670.22
	524.396	146.796	259.179			1446.12	1913	2833.22	2468.66	2949.49
	545.491	147.929	224.281			1339.92	1714	3352.31	3137.52	2440.42
	599.888	150.209	256.833			1278.23	2531.99	2934.98	3313.19	2292.36
	486.717	144.931	277.747			1598.36	2721.42	3564.52	2677.22	2851.31
	572.594	141.241	189.803			1536.77	2267.81	3574.25	2964.93	2495.21
	598.941	184.358	278.782			1375.11	2176.8	3826.26	3090.25	2827.9
	480.729	128.74	236.973			1817.86	2519.08	2875.01	3151.67	2758.82
	550.692	143.609	257.581			1784.03	2145.34	3229.44	2822.78	2919.03
	529.214	158.68	209.257			1595.77	2832.04	3260.69	2544.98	2246.23
	458.117	160.98	354.081			1771.63	2336.88	3516.68	3762.64	2601.54
	388.505	137.244	209.179			1865.88	2650.73	3480.81	2991.83	3043.41
	430.257	163.769	213.498			1636.7	1962.83	3208.87	3676.03	2557.04
	509.6	170.242	251.216			1411.39	2562.23	3732.08	2744.32	2420.15
	559.302	159.402	205.793			1576.85	2516.17	2637.57	3436.32	2548.9
	538.616	167.68	259.562			1726.08	2778.08	1995	3317.2	2380.84
	547.878	165.947	269.326			1675.61	2553.6	3259.29	3287	2353.21
	472.565	172.918	208.435			1231.81	2366	2066	3202.7	3350.01
	365.347	178.146	195.434			1458.85	2315.59	2398	2929	2729.96
	526.203	160.721	200.44			1761.83	2762.35	2769.09	3024.85	2689.17
	441.424	176.789	178.81			1362.55	2372.28	2263.18	2916.11	3035.53
	399.697	162.574	184.756			1512.91	2550.65	2395	3119.69	2725.98
	436.4	185.11	181.865			1796.13	2835.06	2032	2778.55	3290.1
	381.248	165.933	210.061			1890.3	2091.06	2313	3330.11	2072.18
	336.903	156.348	188.027			1518.19	2372.38	2745.23	3135.74	2474.47
	323.84	152.245	211.559			1872.77	2615.7	2909.01	3308.54	2605.39
	437.911	154.735	316.952			1639.25	2301.38	2026.4	3155.32	2815.36
	360.207	153.107	178.486			1570.68	2358.33	2906.17	3594.79	2659.75
	486.786	178.925	308.277			1598.15	2283.62	2957.35	3550.82	2962.75
	513.888	144.565	241.575			1766.88	2556.7	2828.29	3340.53	3185.26
	411.88	283.488	230.512			1589.03	2827.51	2982.47	2771.51	2799.11
	400.544	296.626	311.483			1609.86	2557.05	3252.62	3427.1	2754.7
	364.743	315.728	259.928			1639.28	2120	2837.82	3329.25	2857.15
	434.363	287.619	222.299			1690.53	2146	2624.14	2416.29	2760.9
	421.716	271.378	191.748			1596.09	1725.52	3307.18	3352.27	3067.79
	420.305	254.778	235.293			1499.49	2074	2724.07	2763.24	2606.79
	215.498	296.807	205.683			1561.16	1964	2530	3497.33	2162.21
	360.6	293.349	186.065			1272.35	1852	2840	4361	2499.18
	189.415	327.769	196.342			1507.33	1691	2073.18	4080.4	2787.29
	366.394	286.699	189.723			1457.85	2103	2500.2	3189.25	2709.54
	317.985	298.091	242.843			1523.49	1937.33	3235.93	3072.77	2650.55
	307.864	372.635	279.434			1519.25	2613.28	2053.52	2683.6	2323.74
	271.931	293.601	225.183			1510.01	1813	2083	2856.94	2381.23
	279.436	304.536	256.818			1284.34	1637	2817.78	3148.38	2410.81
	301.901	374.087	215.594			1505.32	2445.43	2873.18	2186.34	2641
	327.964	312.388	214.856			1132.58	2465.79	2546.1	3018.89	1930.05
	303.937	284.958	305.831			1612.45	2645.88	2888.67	2899.68	2525.25
	334.196	318.146	289.838			1690.92	2141.14	2896.16	2195.91	2558.47
	254.1	355.265	165.949			1550.21	2097.84	3428.64	2085.81	2353.78
	284.573	322.061	206.215			1428.66	1984.16	2718.53	2777.53	2121.41
	465.974	278.351	303.654			1643.27	2218	2472.82	2701.4	2441.81
	509.227	223.105	263.354			1801.99	2046	2500.77	2651.48	2184.54
	420.487	271.78	312.577			1526.48	2297.03	2521.4	2230	2290.91
	398.658	246.926	336.212			1440.14	2842	2458.77	2743.36	2173.68
	333.846	270.837	350.902			1398.54	2439.33	2723.79	2815.89	2450.1
	306.162	295.697	219.603			1235.27	1904.62	2844.37	3145.35	2241.22
	490.6	300.87	327.032			1263.17	2569.41	2305.66	3126.33	2377.22
	233.351	275.289	276.421			1426.62	2441.9	2868.49	3039.89	2653.77
	375.824	257.769	369.754			1668.89	1650.67	2671.47	3216.77	2515.52
	483.896	233.238	419.466			1245.72	2399.61	2507.7	2175.09	2432.16
	364.239	290.107	303.819			1374.94	1636	2764.69	2988.44	2610.62
	394.015	171.828	286.949			1396.64	1819	2697.68	2735.2	1738
	525.515	288.049	274.913			1693.71	2665.9	2472.54	3082.51	2528.11
	530.256	282.344	350.638			1685.36	2598.32	2569.74	2896.87	2398.35
	550.504	284.088	376.822			1622.41	2331.14	2004.35	3193.98	2604.18
	456.439	296.99	264.641			1471.64	2113.88	2769.02	2926.94	2306.87
	417.992	283.204	242.246			1319.68	2344.52	2696.22	3048.93	2326.64
	379.193	292.737	441.983			1230.58	1608.21	1951.39	2639	2430.1
	477.544	312.599	243.501			1157.11	1700.83	1979	3115.71	2611.71
	375.441	292.535	225.367			1734.79	2276	2839.94	3058.84	2635.13
	341.805	291.626	224.136			1405.71	1769.17	2248.94	2781.33	2602.55
	412.186	267.955	297.526			1347.6	1874.28	3236.74	2523.28	2522.37
	506.772	312.612	275.273			1418.28	2195.2	2362.65	2847.86	2681.47
	396.929	268.025	286.493			1611.01	1812.28	2581.57	3108.22	2367.38
	465.665	290.863	222.871			2013.22	2440.55	2614.04	2805.28	2655.47
	360.094	302.086	287.949			1792.73	2576.78	2663.46	2046.93	5664.29
	366.2	296.916	231.418			1288.33	2042.98	3078.46	2997.26	2659.57
	423.089	317.387	238.037			1249	1913.38	2578.18	3019.02	1909.69
	323.9	337.199	266.825			1802	1840.86	1946.5	3180.99	2087.14
	368.873	192.944	231.323			1849	2982.11	2067.64	2782.87	2484.5
	499.109	324.928	217.757			1307	2967.25	2838.5	2476.4	2198.22
	361.984	311.271	215.429			2032	2337.11	1847.87	2925.96	2690.43
	373.186	372.866	209.535			1287.25	2375.5	2654.65	3034.29	2432.85
	303.698	320.282	249.02			1281	3100.95	1955.41	2303.43	2517.55
	482.151	334.251	207.323			1550	2875.64	2626.12	3189.82	2159.71
	456.235	218.913	221.342			1486	2611.79	3034.3	3234.58	1564.7
	425.945	334.686	238.929			1714	2336	2626.16	2865.74	2363.31
	306.081	326.076	227.173			1635	2967.1	2809.54	2208	2412.84
	425.773	296.199	188.575			1179	3076.72	2406.2	2604.93	2394.85
	307.569	351.827	213.562			1140	2811.22	2152.16	3027.08	2182.1
	448.88	336.437	237.672			1247	2856	1983	2563.39	1833.33
	419.417	275.758	235.292			1338	2934	2119.75	2876.51	2055
	302.736	330.971	199.386			1784	2801	2066	3365.21	2165.5
	466.289	378.32	219.887			2123.45	2364.1	1723	2148.64	1739
	451.04	215.839	227.841			1997.65	2944.75	1812	2897.24	2117.5
	420.931		212.992			1875	2618	1582	2595.61	2188.75
	305.886		205.622			1846.43	2203	1637	2514.97	2105
	315.849		212.254			2000.63	2996.07	2049.5	2650.37	2124.88
	349.466		219.819			1512	3194.32	2243	2633.15	2434.3
	315.55		227.859			1882.5	3235.07		3087.06	2169.42
	235.669		225.392			1582	2211.79		2687.55	2412.17
	225.637		240.407			1585	2735.26		2433	2189.33
	335.916		232.772			1710	3132.92		2407.9	2159.84
	325.387		161.281			1799.55	3140.22		2652.53	2368.51
	442.311		206.251			1954.47	3072.39		2166	1754.28
			158.152			2025.23	2572.66		2686	1929.42
			206.124			1638.16	3206.26		2334.4	2364.41
			193.754			2189.98	2227.47		2968.14	2352.59
			203.559			1696.38	2847.33		3217.5	2259
			214.401			1540.17	2923.29		2602.57	1832.99
			178.389			1446	3339.72		2207.62	1789.98
			228.297			1782.62	3047.15		2133.67	2330.91
			229.26			2054.88	3142.38		2802.85	2594.24
			187.194			1942.5	2992.96		2968.8	2280.39
			230.72			1704.5	3137.1		3953	2553.43
			149.088			1624	2877.83		2646	2377.73
			187.067			2114.73	2265		2354	1770.78
			206.543			1590	2330.33		2831	2617.12
			184.336			1631.5	3284.36		2143.5	2508.97
			184.963			1583	2240.17		2272.11	1863.54
			196.598			1348	2655		2163	2426.58
			180.005			1449	3335.92		2380	2352.89
			195.615			1710	2971.64		3475.78	2680.95
			194.957			1637	3167.32		2714.5	2485.62
			190.383			1699	3384.48		3636.32	2206.61
			202.479			1504.9	2859.11		2533	1850
			192.337			1553	3459.3		3065.85	2503.47
			201.879			1649.5	2443.8		2759.5	2704.3
			189.205			1477	3199		3228.93	1994.57
			187.266			1573	2311		2998.95	2344.33
			178.907			1747.29	3024.78		2488.87	2539.17
			182.727			1427	2265		2955.14	1772
			200.722			2214.65	2636.11		2883.82	1912.68
			180.608			1984.72	2025.25		3583.46	1838.67
			190.765			1749	2501		2899.4	2522.19
			201.93			1495	2565.55		2797.7	2249.91
			202.504			1692	2831.71		2219.5	1800.16
			186.449			1518.52	2148		3000	2367.47
			204.527			1491	2749		3011.82	2242.32
						1546.8	2597		3106.22	2454.18
						1551	2444		3343.16	2533.67
						1557	2487		3299.12	2573.77
						1914.11	2335		3001.92	2743.99
						1438	2476		3127.3	1984.68
						1906.11	2506.3		2961.19	2108
						1820.81	3096.11		3220.94	1741.75
						1647	2868.67		3095.15	1750
						1542	2151		3212.66	2426.43
						1447	2221		3114.96	1965.37
						1480.5	2357		2415.99	1867.73
						1726	2409.33		3440.68	2267.79
						1390	2182		2823.52	2038.83
						1408	3008.28		2863.82	1932.42
						1640.67	2190		3023.95	1681.79
						1695	2698		2683.67	2230.6
						1466.33	2403.29		3317.77	2055.03
						1693	3127.7		2689.14	2060.36
						1488	2198		3067.06	2177.17
						1623.08	2200		2393.18	1865.96
						2099.28	2318.33		3188.58
						1720.12	2750.69		2661.73
						2186.94	2504.5		2800.04
						2426	3089.3		2713.51
						1301	2662		2536
						1456	2972		2746.83
						1340	3506		2918
						1449	2441		2794.25
						1730.5	2748.25		2923.09
						1543.54	2155.12		3147.5
						1575.12	2319.39		2812.06
						2168.08	2006.5		2855.11
						1645	2686		2334.04
						1644.75	2210.33		2471
						1577.67	2921		3287.49
						1374	2686		2642.69
						1575	3039.24		2925
						1434	2853.5		2731.81
						1342	3041.48		2971.77
						1230	2253.33		2567.65
						1805.37	2792.09		2557.91
						2073.09	3133.18		2632
						2264.67	2457.09		2594
						2181.78	2255.6		2617
						1565	2943.16		3018
						1840.48	2080.16		2570
						1593	2180.08		2479.85
						1740.33	3032.45		2407
						1953.07	2477.18		2210.67
						1701	2491.5		2343
						1642.5	2207.5		2414.6
						2033.18	2403		2562.73
						1779.5	1995.61		3152.36
						1898.5	2823.31		2241
						1933	2303.03		2274
						1641	2481.51		3037.19
						1651.33	2147.65		2969
						1801.5	2051.12		2903
						1817	2080		2385.5
						1668
						1669
						1460
						1746.67
						1871
						1593
						1643
						2109.74
						2438
						1619
						2040.01
						1606
						1586.67
						1530
						1645
						1937.62
						2109.59
						1334
						1413
						2061.46
						1481
						1457
						1539.5
						1380
						1506
						1292.75
						1322
						1557
						1555
						2002.94
						1934.31
						1770.32
						1480
						1309
						1450
						1624.12
						1901.49
						1737
						1855.74
						1838
						1591
						1676
						1876
						1665
						1868.67
						1558
						1615
						1635.33
						1647
						1663
						1962
						1555.36
						1479.25
						1372
						1918
						1657
						1451
						1602.67
						1679.5
						1788.67
						1685
						1732.5
						1524
						1430.5
						1813.07
						1812
						1327
						1381
						1352
						1458
						1726
						1327
						1617.19
						1595
						1603
						1543
						1736.5
						1540
						2030.04
						1448
						1820.8
						1811
						1713
						1626
						1593.5
						1934
						1515
						1545
						2056
						1476.5
						1612
						1724
						1744
						1319
						1330
						1479.5
						1517
						1490
						1413.5
						1490.75
						1290
						1625
						1551
						1540.5
						1453
						1783
						1404
						1813
						1452
						2075.17
						1653.5
						1464
						1708.5
						1918.54
						1999.67
						1409
						2481
						1411
						1476
						1883.33
						2142
						1478
						1771.89
						1712.5
						1621
						1344

## Sheet: figure 6
	figure 6C					figure 6D
	lacZ;Rasv12	PC;Rasv12	PCWR;Rasv12	PD;Rasv12		lacZ;Rasv12	PC;Rasv12	PCwr;Rasv12	PD;Rasv12
	23245.7	58661.8	20724.3	21920.6		0.674824	0.792292	0.630651	0.540057
	22081.8	39856.8	22251.9	25401		0.614392	0.641512	0.77176	0.620626
	34027.8	24264.5	20602.1	28970.5		0.645139	0.801029	0.695603	0.597612
	25041.6	21248.8	49530.6	25822.1		0.337048	0.873564	0.26419	0.583848
	23150.4	24293.5	27546.7	20598.6		0.714228	0.814858	0.259164	0.567787
	27162.2	40731.4	27234	20521.9		0.648311	0.879251	0.29737	0.757099
	26353.2	23988.8	21495.6	26953.6		0.783746	0.782326	0.270641	0.705391
	24462.4	43609.1	21583.5	21974.6		0.466321	0.833642	0.727422	0.576575
	24860.7	25781.6	20697	21413.5			0.84171	0.59782	0.714658
	37453.1	22551.9	32604.8	20458.6				0.75264	0.586184
	22318.6	21639.1	26826.3	25804.8				0.568479	0.727109
	20020.2	31624.1	20800.7	21844.2				0.341213
	23659.1	25990.7	26210.5	24257.2
	21171.7	41709	21498.3	22741.2
	20472.5	46334.8	22598.6	21113.5
	21479.8	31692.8	22371.8	20538.1
	20924.1	22831.5	21563.9	23886.6
	20237.7	39373.6	35323.6	21442.4
	21119.2	22421.5	31430.1	24205.9
	21224.1	47001.2	28454.1	32712.4
	30587.9	24495.5	24028.5	24428.4
	23753.6	20686.5	20494.9	23652.5
	27328.8	20908.3	27614.6	20197.6
	28788.1	21347.2	30758.7	34197.5
	26921.6	28550.2	26786.2	29900.3
	25720.3	24012.7	28351.2	20106.9
	27255.2	24140.7	30526.6	23644.4
	20773.3	22668.8	29691.7	21330.6
	32579.3	22835.7	20252.7	32635.3
	20622.5	36205.9	22883.9	23704.6
	41897.2	24495.5	25887.7	30640.3
	25282.6	20686.5	22123.5	35505.2
	20104.2	20908.3	20015.9	33395.7
	40817	21347.2	20119.3	21610.5
	40527.4	28550.2	29831.6	20297.8
	28892.6	24012.7	27933.5	27603.8
	21458.6	24140.7	36043.9	22958
	22513.7	22668.8	21147.8	42891
	29478.4	22835.7	23462.8	24192
	22398.4	36205.9	24593.1	26826.7
	20200.7	60543.3	22828.8	23576.5
	22418.1	22769.8	22029.4	20079.6
	20137	47714.2	28959.7	25285.7
	20306.3	44152.8	21522.6	36787.8
	20561.2	21580.9	22143.5	20434
	24770.5	24254.9	28831.3	21889.8
	22536.1	45475.9	31453.3	21008.6
	36775.9	78528.9	24685.7	20537.7
	20528.4	40997.1	20040.2	21597.4
	29125.9	28782.3	22528.4	35454.7
	24087.5	38720.3	21725.9	24531.4
	22651	83751.2	26152.6	26383.2
	20785.7	54651.1	36885.4	21771
	21944.1	39958.6	22931.8
	20194.9	20933	27207.7
	23319.3	59901.6	24360.6
	24622.8	31092.7	24598.5
	23768.2	47099.1	22851.5
	22259.2	24611.2	31542
	21941	29961.2	20120
	27606.5	25016.9	30689.7
	27692.1	52472.6	22365.2
	21153.6	68639.9	20775.6
	21626.8	39090.1	26287.6
	24689.9	20651.5	20187.9
	21912.5	22642.1	32671.5
	22520.7	35205.2	23307.4
	23853.8	69335.6	42696.2
	21089.2	36235.2	29980.9
	20200.3	20810.3	30017.5
	20303.6	34733.1	38706.4
	20701.6	20922.2	20552
	22356.8	21756.7	21385
	22772.5	37745.8	20818.4
	24122.6	24357.1	22947.6
	22342.5	20645.3	20534.2
	24128	23851.1	21275.4
	21137.8	26466.2	26461.5
		20677.7	20333.3
		45342.5	21089.5
		52525.8	26397.5
		59530.2	22664.5
		32371.5	20318.3
		23521.4	31528.8
		23288.9	24821.4
		35790.6	28597.6
		57290.4	20478.3
		33147	22652.2
		30088.9	20080.3
		23706.1	24212.5
		35640.2	23541.8
		23324.7	26145.3
		26770.4	24559.5
		22938.3
		20034.8
		22747.4
		26753.1
		50340.8
		41346.1
		33414.6
		62351.6
		21013.6
		23162.4
		31686.2
		39465.3
		28143.7
		45472.1
		20240.8
		31309
		44744
		21709.7
		31961.9
		27581.4
		35111.1
		31827.7
		20392.7
		22079.9
		32215.3
		48937.5
		25015.4
		26425.3
		26770.8
		24683.7
		21392.7
		20439.7

## Sheet: figure 7
	figure 7B_survival
		Larvea	Pupea	Adult
	DMSO GFP+GFP	0	0	100
	p53 inhibitor GFP+GFP	0	0	100
	DMSO Ras+GFP	0	100	0
	p53 inhibitor Ras+GFP	41.7	58.3	0
		figure 7C_volume
		DMSO	p53 inhibitor
		25.83	38.99
		27.93	41.96
		30.73	36.5
		18.63	37.73
		31.62	35
		29.88	28.44
		figure 7D_Caspase3
		DMSO	p53 inhibitor
		1322.88	952.615
		944.532	906.497
		929.618	910.831
		945.183	909.957
		905.86	897.736
		932.47	857.967
		941.602	636.502
		880.856	650.127
		857.796	660.042
		868.987	669.372
		798.974	671.576
		954.618	940.851
		986.888	920.774
		1045.67	945.677
		1093.83	934.414
		1120.45	921.035
		1752.29
		1854.93
		1875.69
		1929.26
		1871.43

## Sheet: figure 8
U87MG	shGFP+siRNA Ctrl	shGFP+siNMNAT1	shp53+siNMNAT1	shGFP+siNMNAT2	shp53+siNMNAT2
	1	2.131	0.764	2.16	0.476
	1	2.016	0.672	1.691	0.471
	1	2.019	0.732	3.648	0.761
T98G	1	2.11	1.404	5.463	1.496
	1	1.772	1.232	4.081	1.107
	1	1.541	1.138	1.879	0.638

[truncated: 10 more sheets: figure 9, figure 10, figure 2_figure supplement 2, figure 2_figure supplement 3, figure 3_figure supplement 1, figure 3_figure supplement 2, figure 3_figure supplement 3, Sheet2, figure 8_figure supplement 1, figure 9_figure supplement 1 ]
